# Supplementary material for: Sequence-based engineering of dynamic functions of micrometer-sized DNA droplets
Source: PubMed Central journal article supplement — Sci Adv. 2020 Jun 3;6(23):eaba3471. doi: 10.1126/sciadv.aba3471 (PMC7269647; doi:10.1126/sciadv.aba3471), 2020-06-03
Supplement: aba3471_SM.pdf [file aba3471_SM.pdf]

[advances.sciencemag.org/cgi/content/full/6/23/eaba3471/DC1](https://advances.sciencemag.org/cgi/content/full/6/23/eaba3471/DC1)

## Supplementary Materials for

### Sequence-based engineering of dynamic functions of micrometer-sized DNA droplets

Yusuke Sato, Tetsuro Sakamoto, Masahiro Takinoue\*

\*Corresponding author. Email: [takinoue@c.titech.ac.jp](mailto:takinoue@c.titech.ac.jp)

Published 3 June 2020, *Sci. Adv.* **6**, eaba3471 (2020)  
DOI: 10.1126/sciadv.aba3471

#### The PDF file includes:

Oligonucleotide sequences  
Material compositions  
Supplementary Discussion  
Figs. S1 to S30  
Tables S1 to S10  
Legends for movies S1 to S3

#### Other Supplementary Material for this manuscript includes the following:

(available at [advances.sciencemag.org/cgi/content/full/6/23/eaba3471/DC1](https://advances.sciencemag.org/cgi/content/full/6/23/eaba3471/DC1))

Movies S1 to S3

## Oligonucleotide sequences

The sequences of the oligonucleotide strands were designed using the web software NUPACK (30). Sequences are shown in tables S1–S3 and S5. To ensure the efficient formation of motifs, flexibility of the stem was introduced by inserting two spacer bases (TT or rUrU) at the center of the junction. Each strand was named N-*i*\_l\_M, where ‘N’ represents the name of the motif for which the strand is used, ‘*i*’ is a strand identification number, ‘*l*’ is the length of the sticky end (in nucleotides), and ‘M’ is a modified fluorescent molecule. In the tables, the sticky ends and modified fluorescent molecules are shown in black, the spacer bases in grey, and complementary parts in the stems in the same color.

**Table S1.** Y-motif sequences

| Name      | Sequence (5' – 3')                              |
|-----------|-------------------------------------------------|
| Y-1_12    | GCTAGCGCTAGCCAGTGAGGACGGAAGTTTGTTCGTAGCATCGCACC |
| Y-2_12    | GCTAGCGCTAGCCAACCACGCCTGTCCATTACTTCCGTCCTCACTG  |
| Y-3_12    | GCTAGCGCTAGCGGTGCGATGCTACGACTTTGGACAGGCGTGGTTG  |
| Y-1_10    | GACTCGAGTCCAGTGAGGACGGAAGTTTGTTCGTAGCATCGCACC   |
| Y-2_10    | GACTCGAGTCCAACCACGCCTGTCCATTACTTCCGTCCTCACTG    |
| Y-3_10    | GACTCGAGTCCGGTGGATGCTACGACTTTGGACAGGCGTGGTTG    |
| Y-1_8     | GCTCGAGCCAGTGAGGACGGAAGTTTGTTCGTAGCATCGCACC     |
| Y-2_8     | GCTCGAGCCAACCACGCCTGTCCATTACTTCCGTCCTCACTG      |
| Y-3_8     | GCTCGAGCGGTGCGATGCTACGACTTTGGACAGGCGTGGTTG      |
| Y-1_6     | GCTAGCCAGTGAGGACGGAAGTTTGTTCGTAGCATCGCACC       |
| Y-2_6     | GCTAGCCAACCACGCCTGTCCATTACTTCCGTCCTCACTG        |
| Y-3_6     | GCTAGCGGTGCGATGCTACGACTTTGGACAGGCGTGGTTG        |
| Y-1_4     | GCGCCAGTGAGGACGGAAGTTTGTTCGTAGCATCGCACC         |
| Y-2_4     | GCGCCAACCACGCCTGTCCATTACTTCCGTCCTCACTG          |
| Y-3_4     | GCGCGGTGCGATGCTACGACTTTGGACAGGCGTGGTTG          |
| Y-1_2     | GCCAGTGAGGACGGAAGTTTGTTCGTAGCATCGCACC           |
| Y-2_2     | GCCAACCACGCCTGTCCATTACTTCCGTCCTCACTG            |
| Y-3_2     | GCGGTGCGATGCTACGACTTTGGACAGGCGTGGTTG            |
| Y-2_0_FAM | [6-FAM]-CAACCACGCCTGTCCATTACTTCCGTCCTCACTG      |

**Table S2.** Sequences of motifs with four and six branches with 8-nucleotide sticky ends

| Name         | Sequence (5' – 3')                              |
|--------------|-------------------------------------------------|
| Four-1_8     | GCTCGAGCGCTGGACTAACGG AACGGTTAGTCAGGTATGCCAGCAC |
| Four-2_8     | GCTCGAGCGTGCTGGCATACTGACTTTCGCAAATTTACAGCGCCG   |
| Four-3_8     | GCTCGAGCCGGCGCTGTAAATTTGCGTTCATCACTTGGGACCATGG  |
| Four-4_8     | GCTCGAGCCCATGGTCCCAAGTGATGTTCCGTTCCGTTAGTCCAGC  |
| Four-2_0_Cy3 | [Cy3]-GTGCTGGCATACTGACTTTCGCAAATTTACAGCGCCG     |
| Six-1_8      | GCTCGAGCGCTGGACTAACGG AACGGTTAGTCAGGTATGCCAGCAC |
| Six-2_8      | GCTCGAGCCTCAGAGAGGGTGACAGCAATCCGTTCCGTTAGTCCAGC |
| Six-3_8      | GCTCGAGCCCATGGTCCCAAGTGATGTTTGCTGTCACCTCTCTGAG  |
| Six-4_8      | GCTCGAGCCGGCGCTGTAAATTTGCGTTCATCACTTGGGACCATGG  |
| Six-5_8      | GCTCGAGCCAGACGTCACTCTCCA ACTTCGCAAATTTACAGCGCCG |
| Six-6_8      | GCTCGAGCGTGCTGGCATACTGACTTTGTTGGAGAGTGACGTCTG   |
| Six-5_0_Cy5  | [Cy5]-CAGACGTCACTCTCCA ACTTCGCAAATTTACAGCGCCG   |

**Table S3.** Orthogonal Y-motif (<sup>orth</sup>Y-motif) sequences

| Name               | Sequence (5' – 3')                            |
|--------------------|-----------------------------------------------|
| orthY-1_8          | CTCGCGAGAAAGGAACTCTCCGCGTTGACAAAGCCGACACGT    |
| orthY-2_8          | CTCGCGAGGCCTCTGTGTCGCATCTTCGCGGAGAGTTCCTTT    |
| orthY-3_8          | CTCGCGAGACGTGTCCGCTTTGTCTTGATGCGACACAGAGGC    |
| orthY-2_0_Alexa405 | [Alexa405]-GCCTCTGTGTCGCATCTTCGCGGAGAGTTCCTTT |

**Table S4.**  $T_m$  and enthalpy changes ( $\Delta H$ ) of the sequences for the Y- and <sup>orth</sup>Y-motifs. These parameters were obtained using DINAMelt (31) with 350 mM Na<sup>+</sup> and 5  $\mu$ M DNA (for the stems) and 15  $\mu$ M DNA (for the sticky ends) in the mode of ‘Two State melting (hybridization)’  $\Delta H$  was calculated based on the nearest-neighbor method.

| Sequence pair                        | $T_m$ [°C] | $-\Delta H$ [kcal/mol] |
|--------------------------------------|------------|------------------------|
| CAGTGAGGACGGAAGT vs ACTTCCGTCCTCACTG | 63.5       | 122.3                  |
| GTCGTAGCATCGCACC vs GGTGCGATGCTACGAC | 66.1       | 129.4                  |
| CAACCACGCCTGTCCA vs TGGACAGGCGTGGTTG | 67.1       | 129.6                  |
| AAAGGAACTCTCCGCG vs CGCGGAGAGTTCCTTT | 64.8       | 124.7                  |
| GACAAAGCCGACACGT vs ACGTGTCCGCTTTGTC | 65.7       | 127.2                  |
| GCCTCTGTGTCGCATC vs GATGCGACACAGAGGC | 66.0       | 127.7                  |
| GCTCGAGC vs GCTCGAGC                 | 45.9       | 62.0                   |
| CTCGCGAG vs CTCGCGAG                 | 45.5       | 62.8                   |

**Table S5.** Sequences of six-junction motifs (S-motif) and the chimerized-S-motif (CS-motif)

| Name                | Sequence                                                     |
|---------------------|--------------------------------------------------------------|
| S-1_8               | CTCGCGAGGCTGGACTAACGGAACGGTTAGTCAGGTATGCCAGCAC               |
| S-2_8               | CTCGCGAGCTCAGAGAGGTGACAGCATTCCGTTCCGTTAGTCCAGC               |
| S-3_8               | CTCGCGAGCCATGGTCCCAAGTGATGTTTGCTGTACCTCTCTGAG                |
| S-4_8               | GCTCGAGCCGGCGCTGTAAATTTGCGTTCATCACTTGGGACCATGG               |
| S-5_8               | GCTCGAGCCAGACGTCACTCTCCAACCTTCGCAAATTTACAGCGCCG              |
| S-6_8               | GCTCGAGCGTGCTGGCATACTGACTTTGTTGGAGAGTGACGTCTG                |
| S-2_0_Cy3           | [Cy3]-CTCAGAGAGGTGACAGCATTCCGTTCCGTTAGTCCAGC                 |
| S-5_0_Cy5           | [Cy5]-CAGACGTCACTCTCCAACCTTCGCAAATTTACAGCGCCG                |
| CS-1_8 <sup>#</sup> | CTCGCGAGGCTGGACTAACGGArArCrGrGrUrUrArGrUrCAGGTATGCCA<br>GCAC |
| CS-4_8 <sup>#</sup> | GCTCGAGCCGGCGCTGTAAATTrUrGrCrGrUrUrCrArUrCACTTGGGACCA<br>TGG |

<sup>#</sup>The letter “r” precedes a ribonucleotide.

## Material compositions

**Table S6:** Strand concentration to confirm orthogonality

| <b>DNA strand name</b>         | <b>Final concentration</b> |
|--------------------------------|----------------------------|
| Y-1_8                          | 5.0 $\mu$ M                |
| Y-2_8                          | 4.5 $\mu$ M                |
| Y-3_8                          | 5.0 $\mu$ M                |
| Y-2_0_FAM                      | 0.5 $\mu$ M                |
| <sup>orth</sup> Y-1_8          | 5.0 $\mu$ M                |
| <sup>orth</sup> Y-2_8          | 4.5 $\mu$ M                |
| <sup>orth</sup> Y-3_8          | 5.0 $\mu$ M                |
| <sup>orth</sup> Y-2_0_Alexa405 | 0.5 $\mu$ M                |

**Table S7:** Strand concentration for the elimination of orthogonality

| <b>DNA strand name</b>         | <b>Final concentration</b> |
|--------------------------------|----------------------------|
| Y-1_8                          | 5.000 $\mu$ M              |
| Y-2_8                          | 4.500 $\mu$ M              |
| Y-3_8                          | 5.000 $\mu$ M              |
| Y-2_0_FAM                      | 0.500 $\mu$ M              |
| <sup>orth</sup> Y-1_8          | 5.000 $\mu$ M              |
| <sup>orth</sup> Y-2_8          | 4.500 $\mu$ M              |
| <sup>orth</sup> Y-3_8          | 5.000 $\mu$ M              |
| <sup>orth</sup> Y-2_0_Alexa405 | 0.500 $\mu$ M              |
| S-1_8                          | 1.650 $\mu$ M              |
| S-2_8                          | 1.650 $\mu$ M              |
| S-3_8                          | 1.650 $\mu$ M              |
| S-4_8                          | 1.650 $\mu$ M              |
| S-5_8                          | 1.485 $\mu$ M              |
| S-6_8                          | 1.650 $\mu$ M              |
| S-5_0_Cy5                      | 0.165 $\mu$ M              |

**Table S8: Strand concentrations for droplet fission**

| <b>DNA strand name</b>         | <b>Final concentration</b> |
|--------------------------------|----------------------------|
| Y-1_8                          | 5.000 $\mu\text{M}$        |
| Y-2_8                          | 4.500 $\mu\text{M}$        |
| Y-3_8                          | 5.000 $\mu\text{M}$        |
| Y-2_0_FAM                      | 0.500 $\mu\text{M}$        |
| <sup>orth</sup> Y-1_8          | 5.000 $\mu\text{M}$        |
| <sup>orth</sup> Y-2_8          | 4.500 $\mu\text{M}$        |
| <sup>orth</sup> Y-3_8          | 5.000 $\mu\text{M}$        |
| <sup>orth</sup> Y-2_0_Alexa405 | 0.500 $\mu\text{M}$        |
| CS-1_8                         | 1.650 $\mu\text{M}$        |
| S-2_8                          | 1.485 $\mu\text{M}$        |
| S-3_8                          | 1.650 $\mu\text{M}$        |
| CS-4_8                         | 1.650 $\mu\text{M}$        |
| S-5_8                          | 1.485 $\mu\text{M}$        |
| S-6_8                          | 1.650 $\mu\text{M}$        |
| S-2_0_Cy3                      | 0.165 $\mu\text{M}$        |
| S-5_0_Cy5                      | 0.165 $\mu\text{M}$        |

**Table S9:** Strand concentrations for the Janus-shaped DNA droplets

| <b>DNA strand name</b>         | <b>Final concentration</b> |
|--------------------------------|----------------------------|
| Y-1_8                          | 5.000 $\mu\text{M}$        |
| Y-2_8                          | 4.500 $\mu\text{M}$        |
| Y-3_8                          | 5.000 $\mu\text{M}$        |
| Y-2_0_FAM                      | 0.500 $\mu\text{M}$        |
| <sup>orth</sup> Y-1_8          | 5.000 $\mu\text{M}$        |
| <sup>orth</sup> Y -2_8         | 4.500 $\mu\text{M}$        |
| <sup>orth</sup> Y-3_8          | 5.000 $\mu\text{M}$        |
| <sup>orth</sup> Y-2_0_Alexa405 | 0.500 $\mu\text{M}$        |
| CS-1_8                         | 0.165 $\mu\text{M}$        |
| S-1_8                          | 1.485 $\mu\text{M}$        |
| S-2_8                          | 1.485 $\mu\text{M}$        |
| S-3_8                          | 1.650 $\mu\text{M}$        |
| CS-4_8                         | 0.165 $\mu\text{M}$        |
| S-4_8                          | 1.485 $\mu\text{M}$        |
| S-5_8                          | 1.485 $\mu\text{M}$        |
| S-6_8                          | 1.650 $\mu\text{M}$        |
| S-2_0_Cy3                      | 0.165 $\mu\text{M}$        |
| S-5_0_Cy5                      | 0.165 $\mu\text{M}$        |

**Table S10:** Strand concentration for the patchy-like pattern in the DNA droplets

| <b>DNA strand name</b>         | <b>Final concentration</b> |
|--------------------------------|----------------------------|
| Y-1_8                          | 5.000 $\mu\text{M}$        |
| Y-2_8                          | 4.500 $\mu\text{M}$        |
| Y-3_8                          | 5.000 $\mu\text{M}$        |
| Y-2_0_FAM                      | 0.500 $\mu\text{M}$        |
| <sup>orth</sup> Y-1_8          | 5.000 $\mu\text{M}$        |
| <sup>orth</sup> Y -2_8         | 4.500 $\mu\text{M}$        |
| <sup>orth</sup> Y-3_8          | 5.000 $\mu\text{M}$        |
| <sup>orth</sup> Y-2_0_Alexa405 | 0.500 $\mu\text{M}$        |
| CS-1_8                         | 0.825 $\mu\text{M}$        |
| S-1_8                          | 0.825 $\mu\text{M}$        |
| S-2_8                          | 1.485 $\mu\text{M}$        |
| S-3_8                          | 1.650 $\mu\text{M}$        |
| CS-4_8                         | 0.825 $\mu\text{M}$        |
| S-4_8                          | 0.825 $\mu\text{M}$        |
| S-5_8                          | 1.485 $\mu\text{M}$        |
| S-6_8                          | 1.650 $\mu\text{M}$        |
| S-2_0_Cy3                      | 0.165 $\mu\text{M}$        |
| S-5_0_Cy5                      | 0.165 $\mu\text{M}$        |



## Supplementary Discussion

The state diagram (Fig. 3A in the main text) shows the state-change temperature between the dispersed and droplet-like states ( $T_d$ ), and between the droplet-like and gel states ( $T_g$ ).  $T_d$  values were 46.3, 48.3, 63.7, 61.3, and 70.3 °C, and  $T_g$  values were 12.3, 18.7, 35.7, 41.3, and 53.3 °C, respectively, when the sticky ends (SEs) were 4–12 nt long. The  $T_d$  for each SE was higher than the  $T_m$  of the SEs.  $T_g$  for the Y-motif with a 4-nt SE was also higher than the  $T_m$  of the 4-nt SE (Fig. 3B in the main text). Here, we discuss what determines the  $T_d$  and  $T_g$  in this study.

First, we discuss the  $T_g$ . As mentioned in the main text,  $T_g$  can be attributed to the stability of SEs and entanglement of motifs. Stable hybridization of SEs results in the formation of static networks of the branched motifs, and the stability is generally characterized by  $T_m$ , which depends on the concentration of the DNA. Hence, we experimentally estimated the concentration of the DNA nanostructures in the gel state (Figs. S12 and S13). Under the estimated concentration, the  $T_m$  of each SE was higher than the  $T_g$  (Fig. 3A in the main text), and the stability of the hybridization of SEs would be enough to form static networks (Fig. S14). The increase in  $T_g$  with the number of branches in the motif (Fig. 3C in the main text) could be explained by entanglement of the concentrated motifs. We determined the  $T_g$  based on the FRAP experiments, which showed mobility of the motifs. The mobility can be decreased by hybridization of the SEs between the motifs, and an increase in the number of branches in a motif induces structural entanglements that also decrease the mobility of the motifs. The  $T_g$  in motifs having four or six branches was higher than their  $T_m$  (Fig. 3C in the main text), and the  $T_g$  in the six-SE motifs was higher than that with four. Therefore, the effects of the entanglement on  $T_g$  would become more dominant than the stability of the hybridization of the SEs.

Next, we discuss the  $T_d$ . The  $T_d$  values in 4–12-nt SEs were much higher than the  $T_m$  of each SE, as described above. The  $T_m$  is generally defined as the temperature at which half of the DNA strands in a solution formed double helices when two complementary DNA strands were present. On the other hand, our motifs have multiple SEs (e.g., Y-motif has three SEs). Thus, the  $T_m$  for the SEs should not be considered, but instead, the  $T_m$  for the motifs ( $T_{m-Motif}$ ) at which half of the motifs in a solution are connected should be considered.

In the branched motifs, the hybridization of one of multiple SEs would be sufficient for a connection between the motifs. Based on this idea, we considered that the  $T_{m-Motif}$  can be described as the temperature at which at least one of the multiple SEs can hybridize at a 50 % ratio. It is calculated by the following equation:

$$1 - (1 - X(T))^k = 0.5,$$

where  $X(T)$  is the hybridization probability of SEs at the temperature  $T$ , and  $k$  is the number of branches in a motif. The  $T_{m-Motif}$  is calculated by obtaining an  $X(T)$  that satisfies this equation.

The  $X(T)$  in the motifs with three, four, and six branches ( $k = 3, 4,$  and  $6$ ) were 21, 16, and 11 %, respectively. This means that the temperature at which the hybridization probability of the SEs for each number of branches exhibit those percentages corresponds to the  $T_{m-Motif}$  (Fig. S15). For example, in the case of a motif having three branches (Y-motif) with a 4-nt SE, 18.8 °C resulted in a 21 % hybridization probability [obtained using NUPACK ( $I$ )], which represents the  $T_{m-Motif}$  of the Y-motif with 4-nt SEs. Similarly, the  $T_{m-Motif}$  values of the Y-motifs with 6-, 8-, 10-, and 12-nt SEs were 29.2, 53.1, 59.3, and

68.0 °C, respectively (Fig. S16). Those  $T_{m\text{-Motif}}$  values were closer to the  $T_d$  than was the  $T_m$  for the SEs in the bulk solution. Furthermore, the  $T_{m\text{-Motif}}$  increased with the number of branches: 53.1 °C for three branches, 55.8 °C for four branches, and 59.6 °C for six branches (Fig. S17). This trend is consistent with the experimental results (Fig. 3C): 63.7, 67.7, and 72.3 °C for three, four, and six branches, respectively. However, there were still gaps between the  $T_d$  and  $T_{m\text{-Motif}}$ , in particular for the shorter SEs, which suggests that another parameter can influence the state-change temperature.

The state diagram also showed that the difference between the  $T_d$  and  $T_g$  becomes larger with decreasing SE length. As the hybridization stability of the SEs plays a key role in determining the state-change temperature of both the  $T_d$  and  $T_g$ , the width of the melting range ( $T_w$ ) provides an indication of the state-change temperature.

In addition to  $T_m$ ,  $T_w$  is also an important parameter for the characterization of melting behavior.  $T_w$  can be defined as the difference between the temperatures at the end and the start of DNA melting (Fig. S18). DNA strands transfer from ssDNA to dsDNA states in the range of the  $T_w$  and *vice versa*. At the start of the melting, SEs can exhibit weak interactions, and at the end of melting, SEs form stable double helices. As the self-assembly of motifs into droplets and gel structures results from weak interactions and stable network formations, we speculated that temperature differences between  $T_d$  and  $T_g$  ( $\Delta T_{\text{droplet-gel}}$ ) were related to  $T_w$ .

We calculated  $T_w$  for each of the SEs from the melting curve using NUPACK (1) (Fig. S19). The  $\Delta T_{\text{droplet-gel}}$  and  $T_w$  are shown in Fig. S20.  $\Delta T_{\text{droplet-gel}}$  and  $T_w$  exhibited closer values and the differences between  $\Delta T_{\text{droplet-gel}}$  and  $T_w$  were smaller for the shorter SEs. Although the entanglement of motifs can influence  $T_g$ , as discussed in the main text, this graph suggests that  $T_w$  may be one of the parameters that determines the state-change temperature.

Taken together, the entanglements of motifs, multiple SEs in motifs that provide new parameters of  $T_{m\text{-Motif}}$ , and  $T_w$  of SEs could be possible factors influencing the state-change temperature, and their combinatorial effects may determine  $T_d$  and  $T_g$ . Model-based numerical simulation could be a feasible approach for better understanding what determines  $T_d$  and  $T_g$  and will be utilized in our future studies.

Supplementary Figs. S1-S30

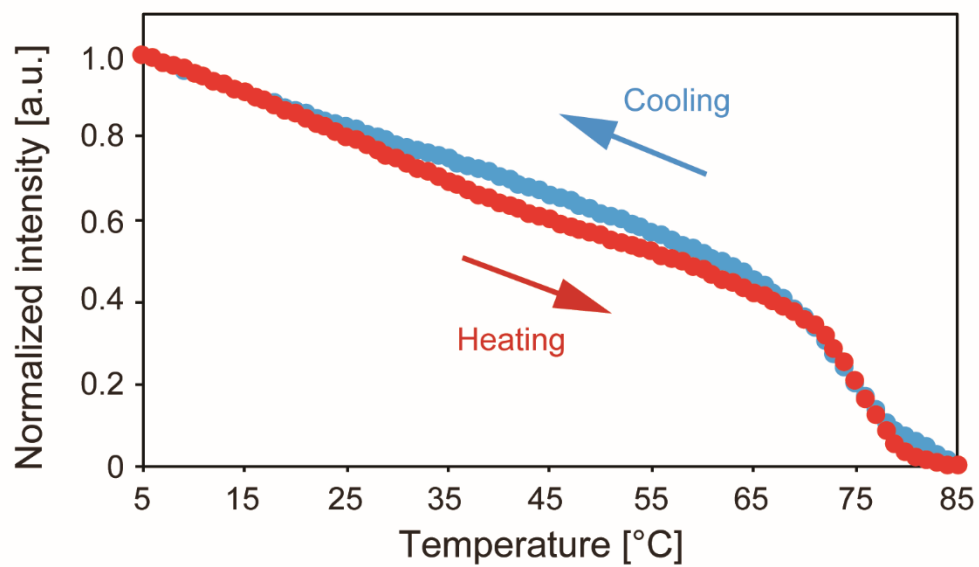

**Fig. S1. Normalized fluorescence intensity during the cooling and heating processes for Y-motifs without sticky ends that cannot connect to one another. The Y-motifs were formed at 75 °C.**

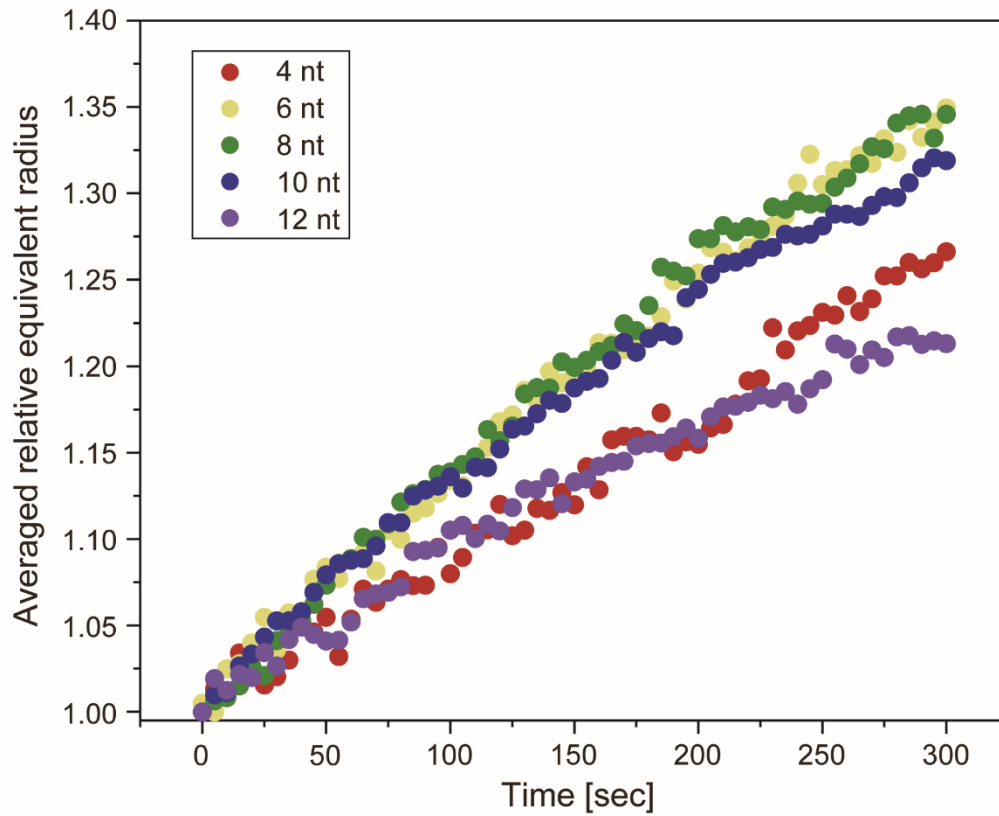

**Fig. S2. Time course of the sizes of DNA droplets composed of Y-motifs at around  $T_d$  (the state-change temperature between the dispersed and droplet-like state) of each sticky end (SE).** To measure the averaged relative equivalent radius of the DNA droplets with different nucleotide lengths of SEs, averaged equivalent radius (AER) in each SE was calculated based on the area of the droplets visualized by a confocal microscope. At each time point, the number of droplets counted for the calculation was over 900. The AERs were then divided by the minimum value to obtain the averaged relative equivalent radius.

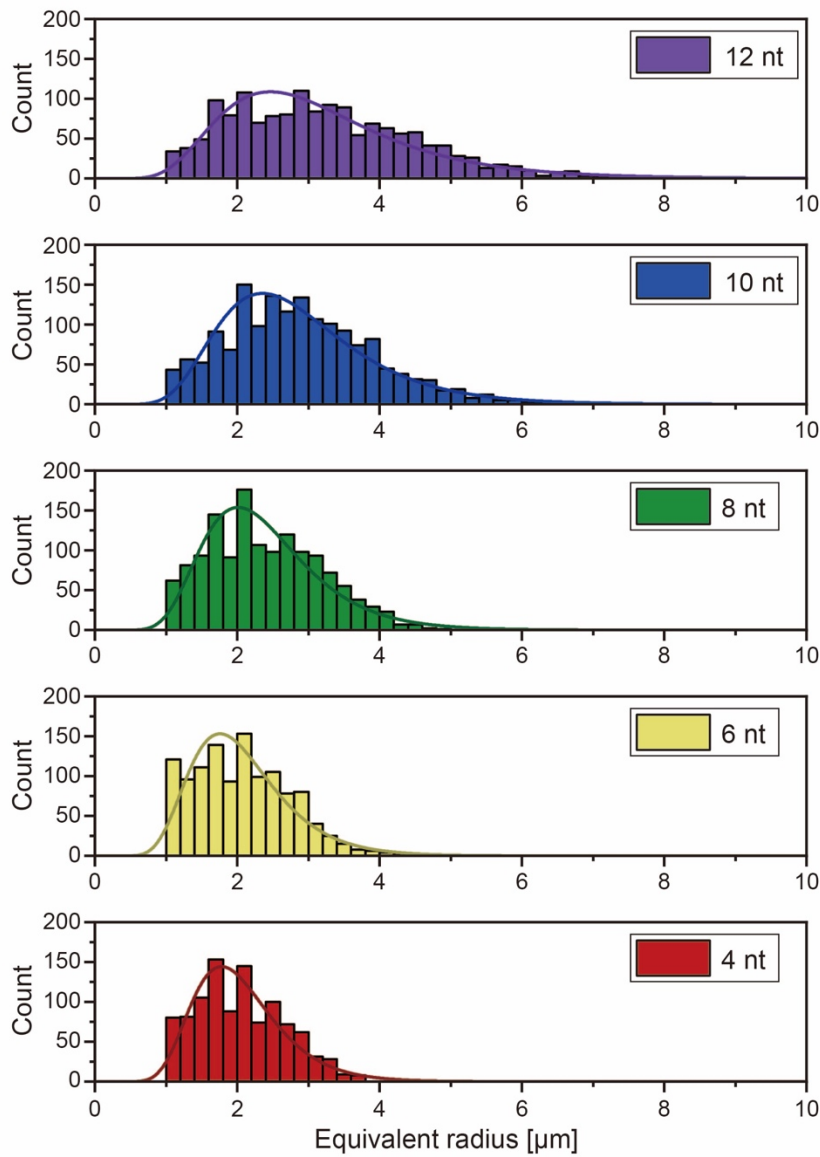

**Fig. S3.** Particle-size histograms of the DNA droplets composed of the Y-motifs of each SE. The data were obtained 700 seconds after the droplet formation. Equivalent radii values were calculated based on the area of the droplets visualized by the confocal microscope. There were over 1,000 droplets for each SE. The colored solid lines in the histogram show fitting curves by a lognormal distribution.

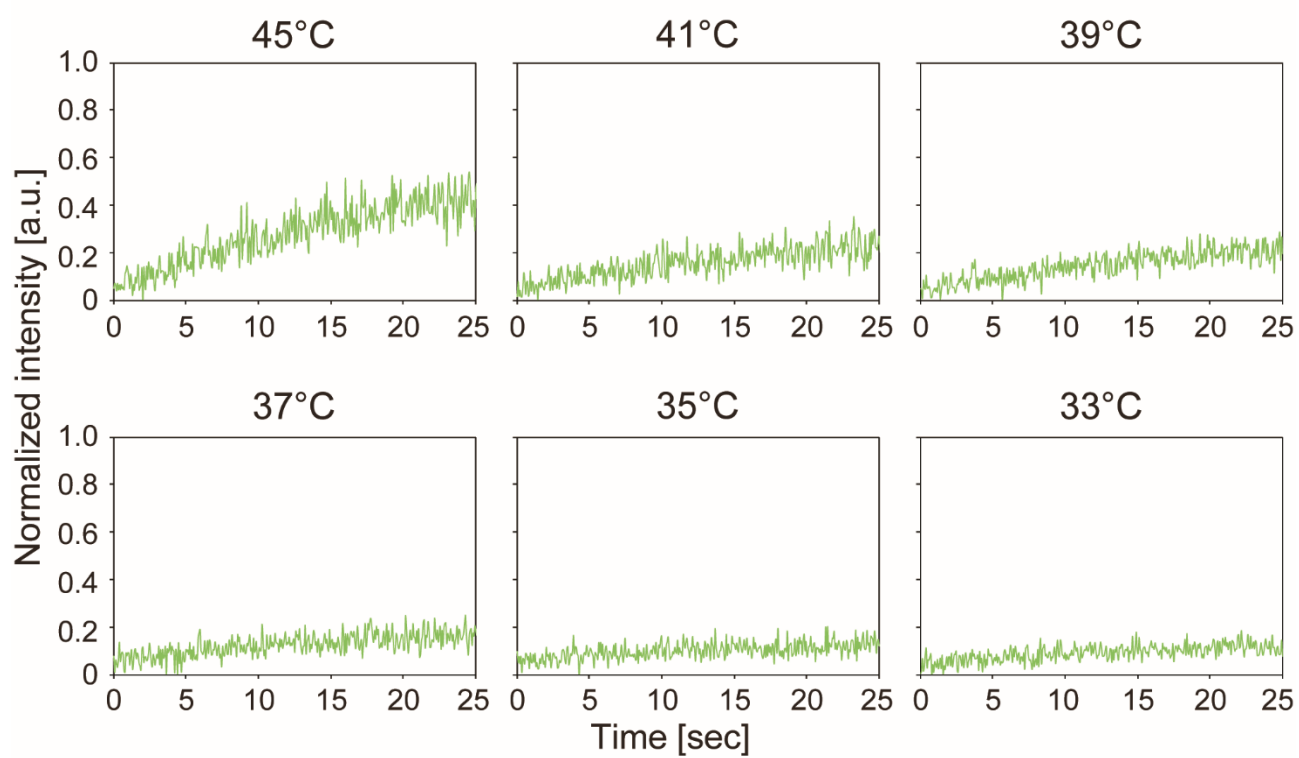

**Fig. S4. Representative results for the FRAP experiments with Y-motifs with 8-nucleotide sticky ends.** The half region of droplets was photo-bleached, and the changes in fluorescence intensity were measured in the bleached regions at each temperature.

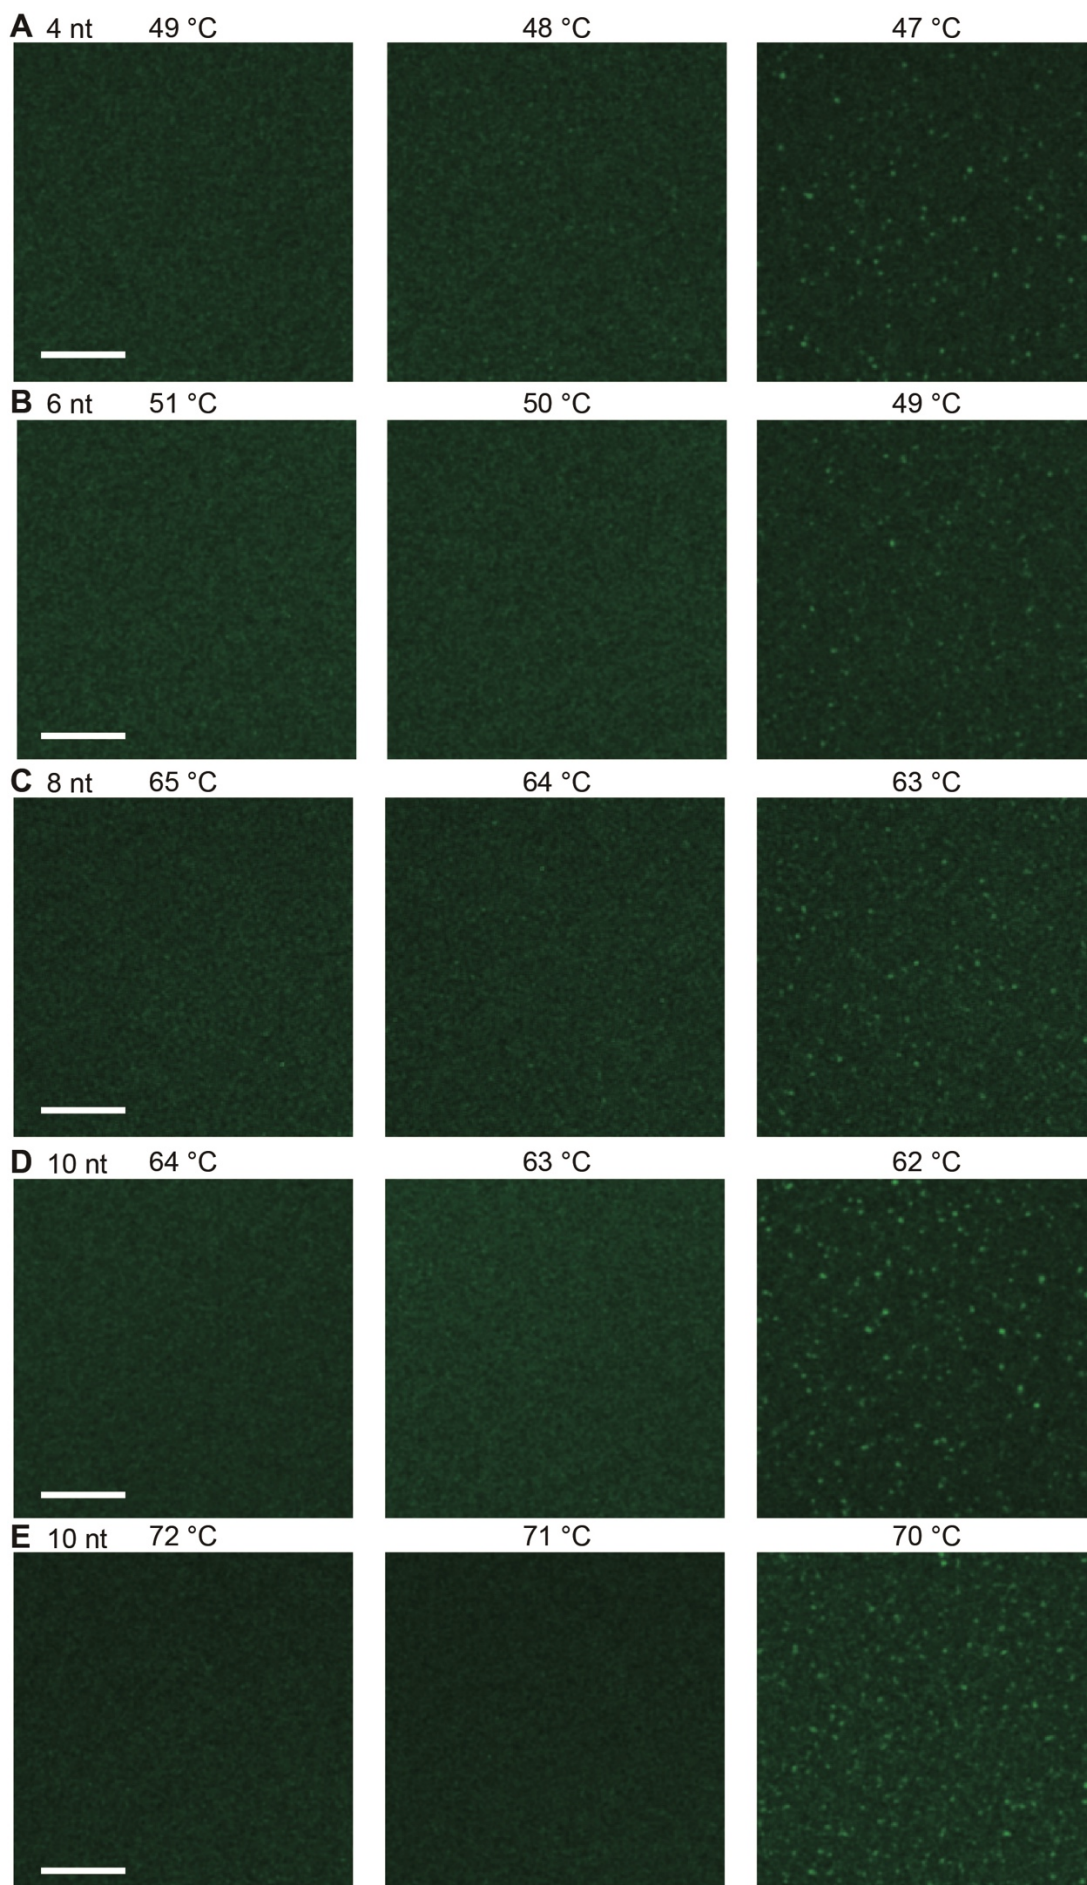

**Fig. S5. Microscopy images representing the moment when DNA droplets composed of Y-motifs with 12-, 10-, 8-, 6-, and 4-nucleotide long sticky ends are formed by phase separation in response to decreases in temperature. Scale bar: 50  $\mu\text{m}$ .**



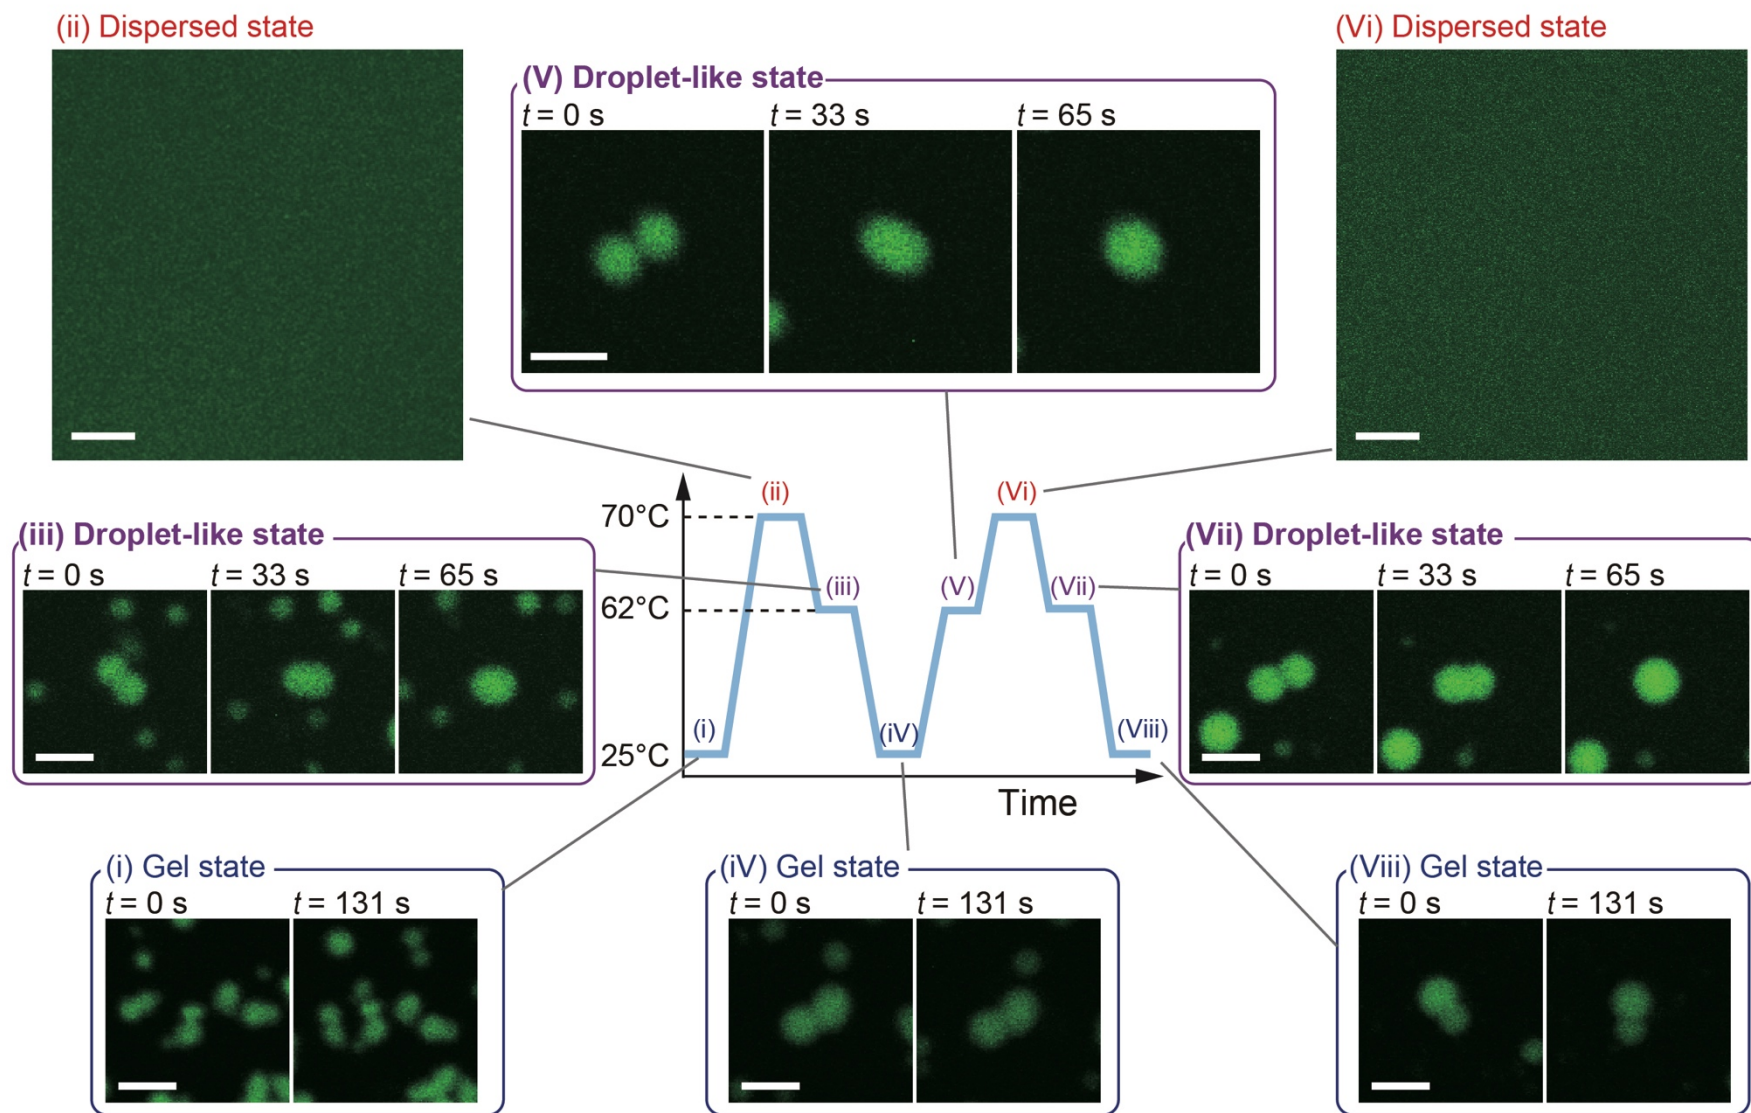

**Fig. S6. Repetitive state changes of Y-motifs with 8-nucleotide sticky ends in response to temperature changes.** The temperature was changed at a rate of  $\pm 20$   $^{\circ}\text{C}/\text{min}$ . Scale bars: (ii) and (vi), 30  $\mu\text{m}$ ; all others, 10  $\mu\text{m}$ .

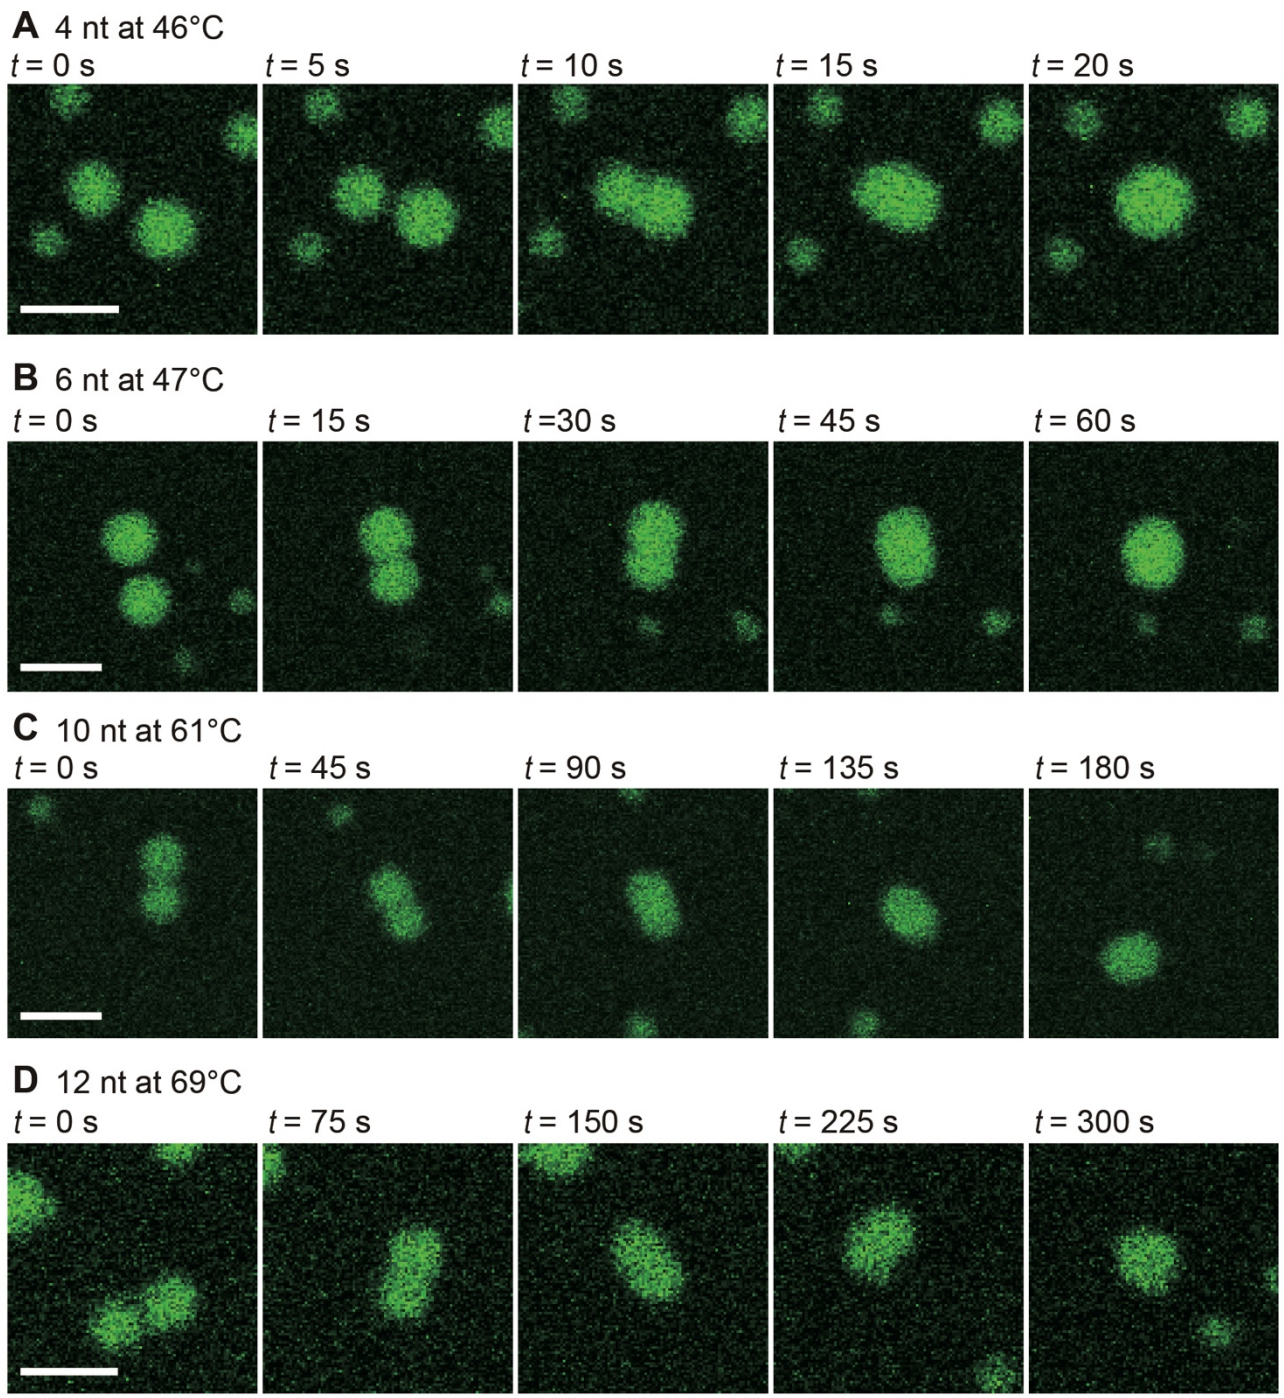

**Fig. S7. Fusion behavior of DNA droplets.** Sequential microscopic images of the droplets composed of Y-motifs that have 4- (A), 6- (B), 10- (C), and 12-nucleotide (D) sticky ends. Scale bars: 10  $\mu$ m.

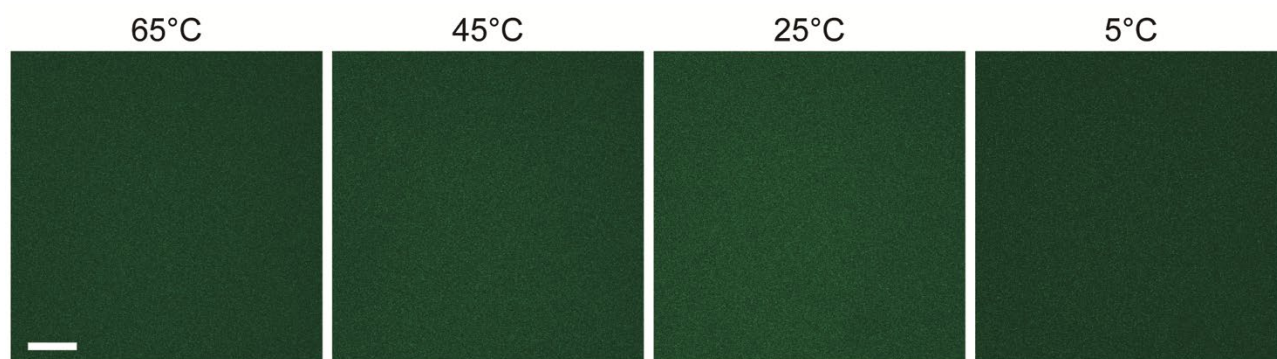

**Fig. S8. Microscopy images for Y-motifs with 2-nucleotide sticky ends visualized at the temperatures shown above the images.** The sample solution in the observation chamber was incubated at 85 °C for 3 min, and then the temperature was decreased to 5 °C at a rate of  $-1$  °C/min. During the annealing process, no micrometer-sized structures were observed. Scale bar: 100  $\mu$ m.

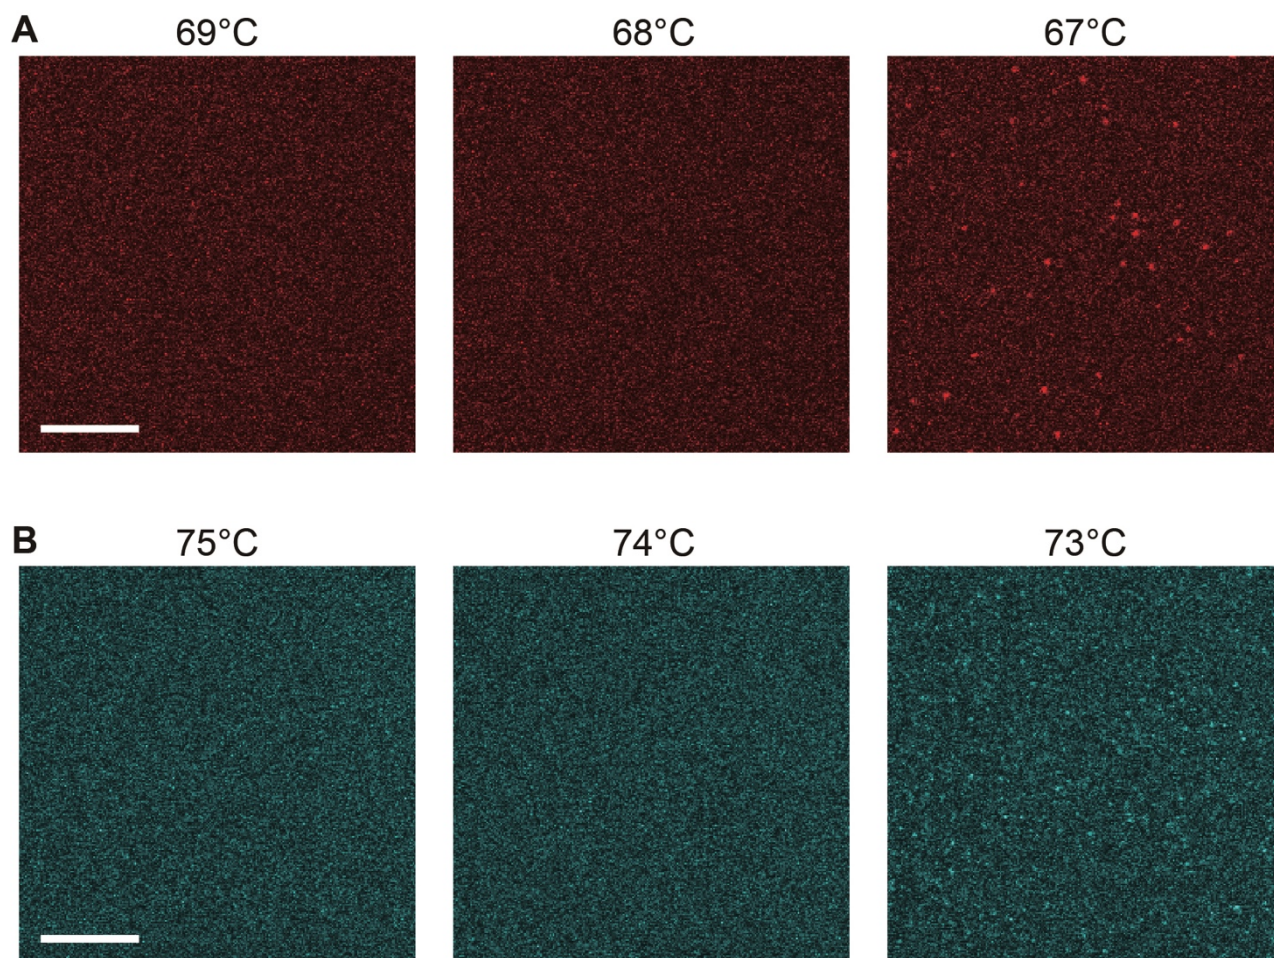

**Fig. S9.** Microscopy images representing the moment when DNA droplets composed of motifs having four (A) and six branches with 8-nucleotide sticky ends (B) are formed by phase separation in response to temperature decreases. Scale bars: 50  $\mu\text{m}$ .

**A** “Four branches” at 68°C

$t = 0$  s

$t = 15$  s

$t = 30$  s

$t = 45$  s

$t = 60$  s

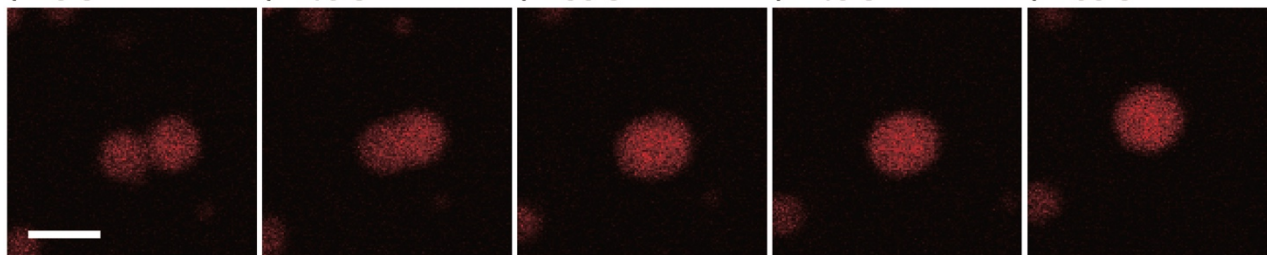

**B** “Six branches” at 74°C

$t = 0$  s

$t = 10$  s

$t = 20$  s

$t = 30$  s

$t = 40$  s

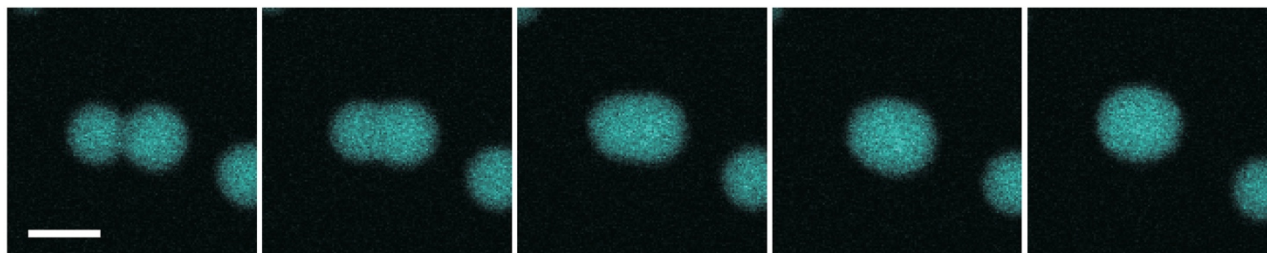

**Fig. S10.** Fusion behavior of DNA droplets composed of motifs having four (A) and six (B) branches with 8-nucleotide sticky ends. Scale bars: 10  $\mu\text{m}$ .

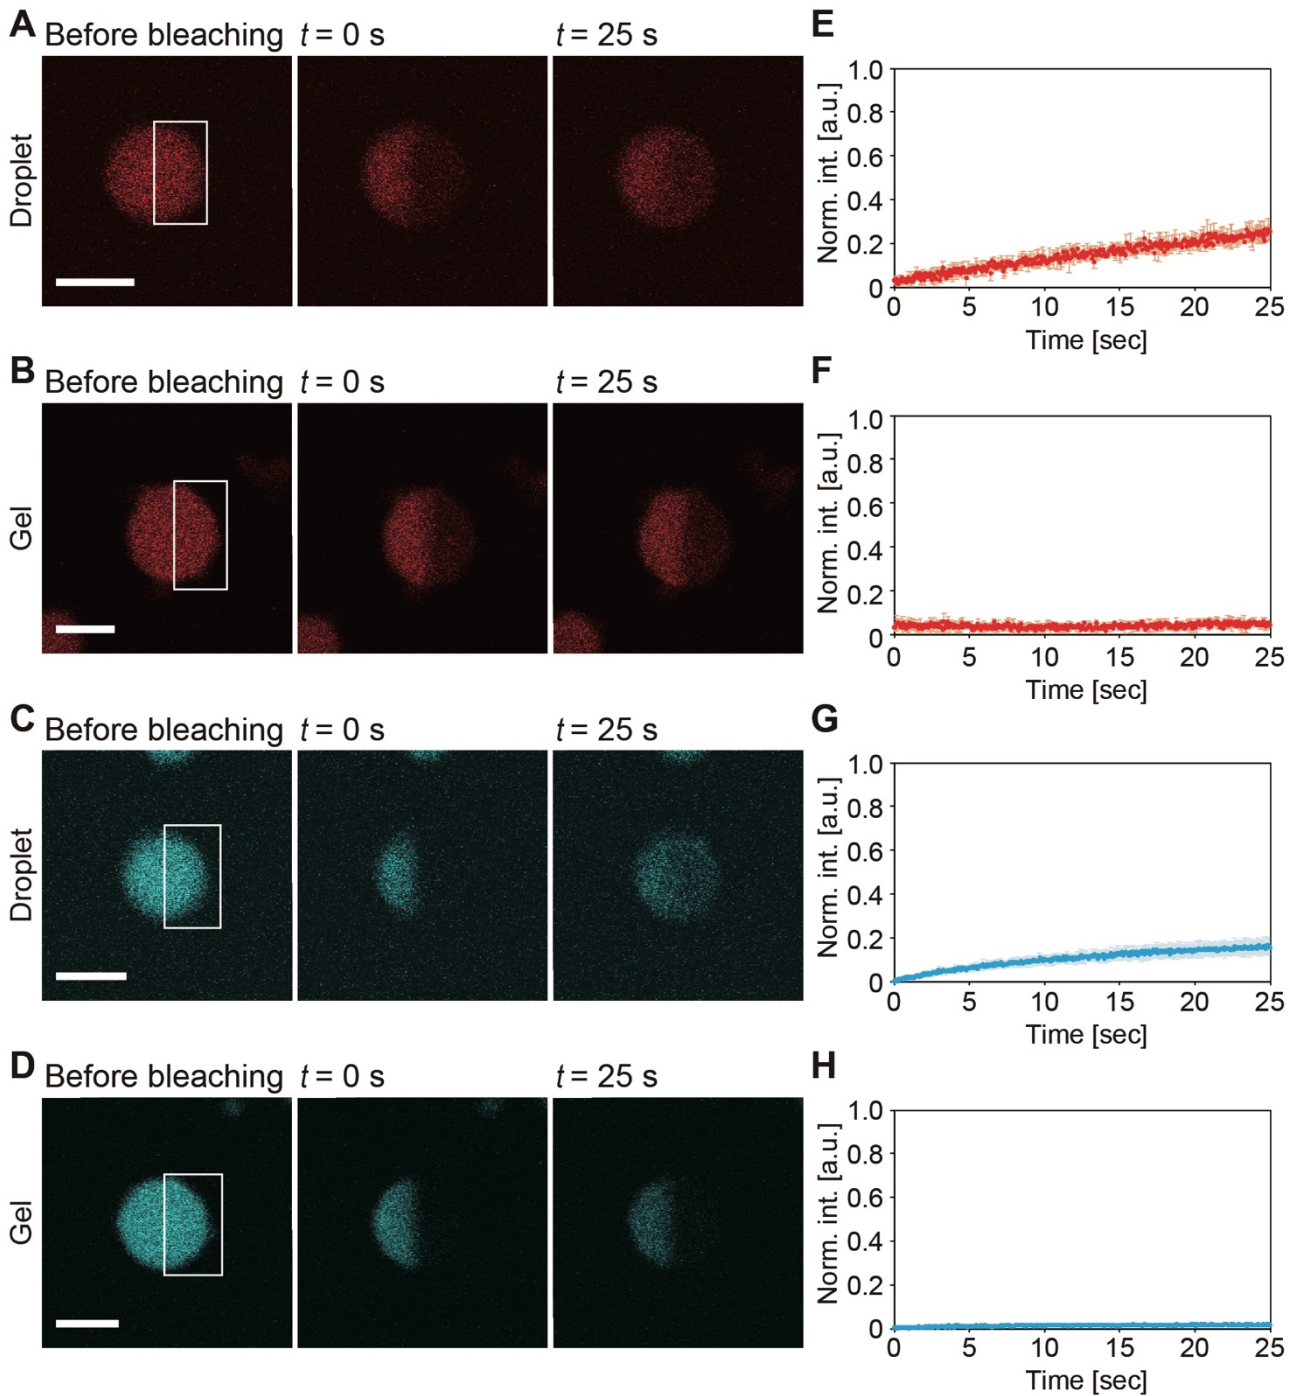

**Fig. S11. FRAP experiments for DNA droplets and hydrogels composed of motifs with four or six branches with 8-nucleotide sticky ends.** (A) and (B) Microscopy images of FRAP experiments for DNA droplets (A) and hydrogels (B) composed of motifs with four branches with 8-nucleotide sticky ends visualized at 68 and 52 °C, respectively. (C) and (D) Microscopy images in FRAP experiments for DNA droplets (C) and hydrogels (D) composed of motifs with six branches with 8-nucleotide sticky ends, visualized at 74 and 60 °C, respectively. The bleached region is indicated by a white box in each image. Scale bars: 10  $\mu\text{m}$ . (E) to (H) Time series of fluorescence intensity corresponding to the images shown to the left of each graph. Bars show the mean  $\pm$  standard deviation (S.D.). The number of measurements ( $n$ ) = 3.

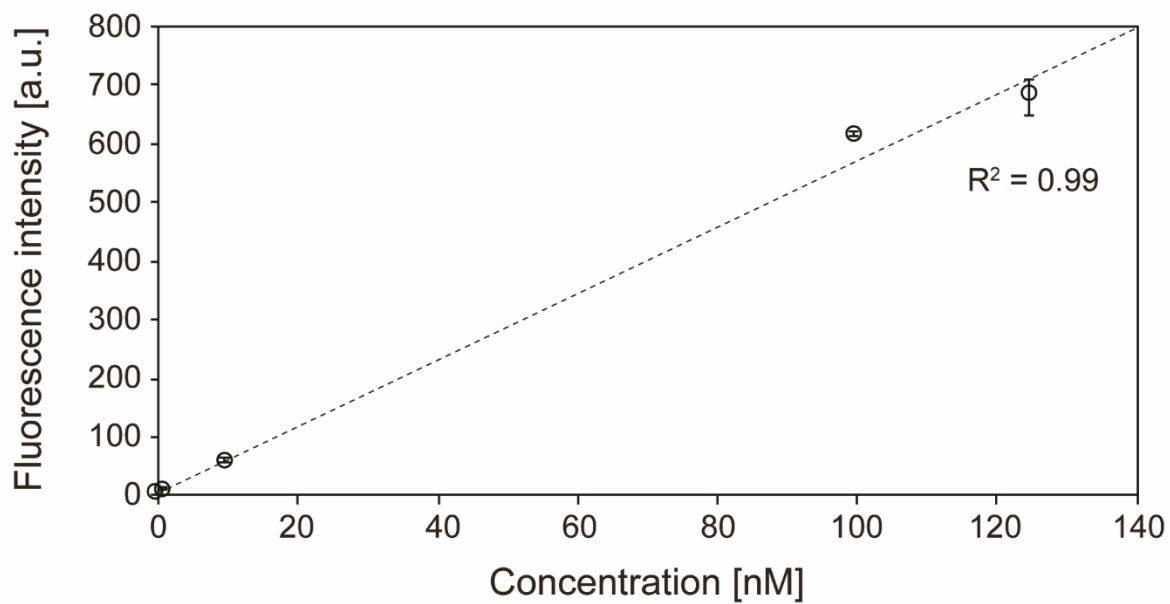

**Fig. S12. Calibration curve to estimate the concentration of Y-motifs in the droplet-like or gel states.** The dashed line through the center of the graph was obtained through linear fitting.  $R^2$  is the deterministic coefficient. Error bars indicate standard deviation (mean  $\pm$  S.D.,  $n = 3$ ).

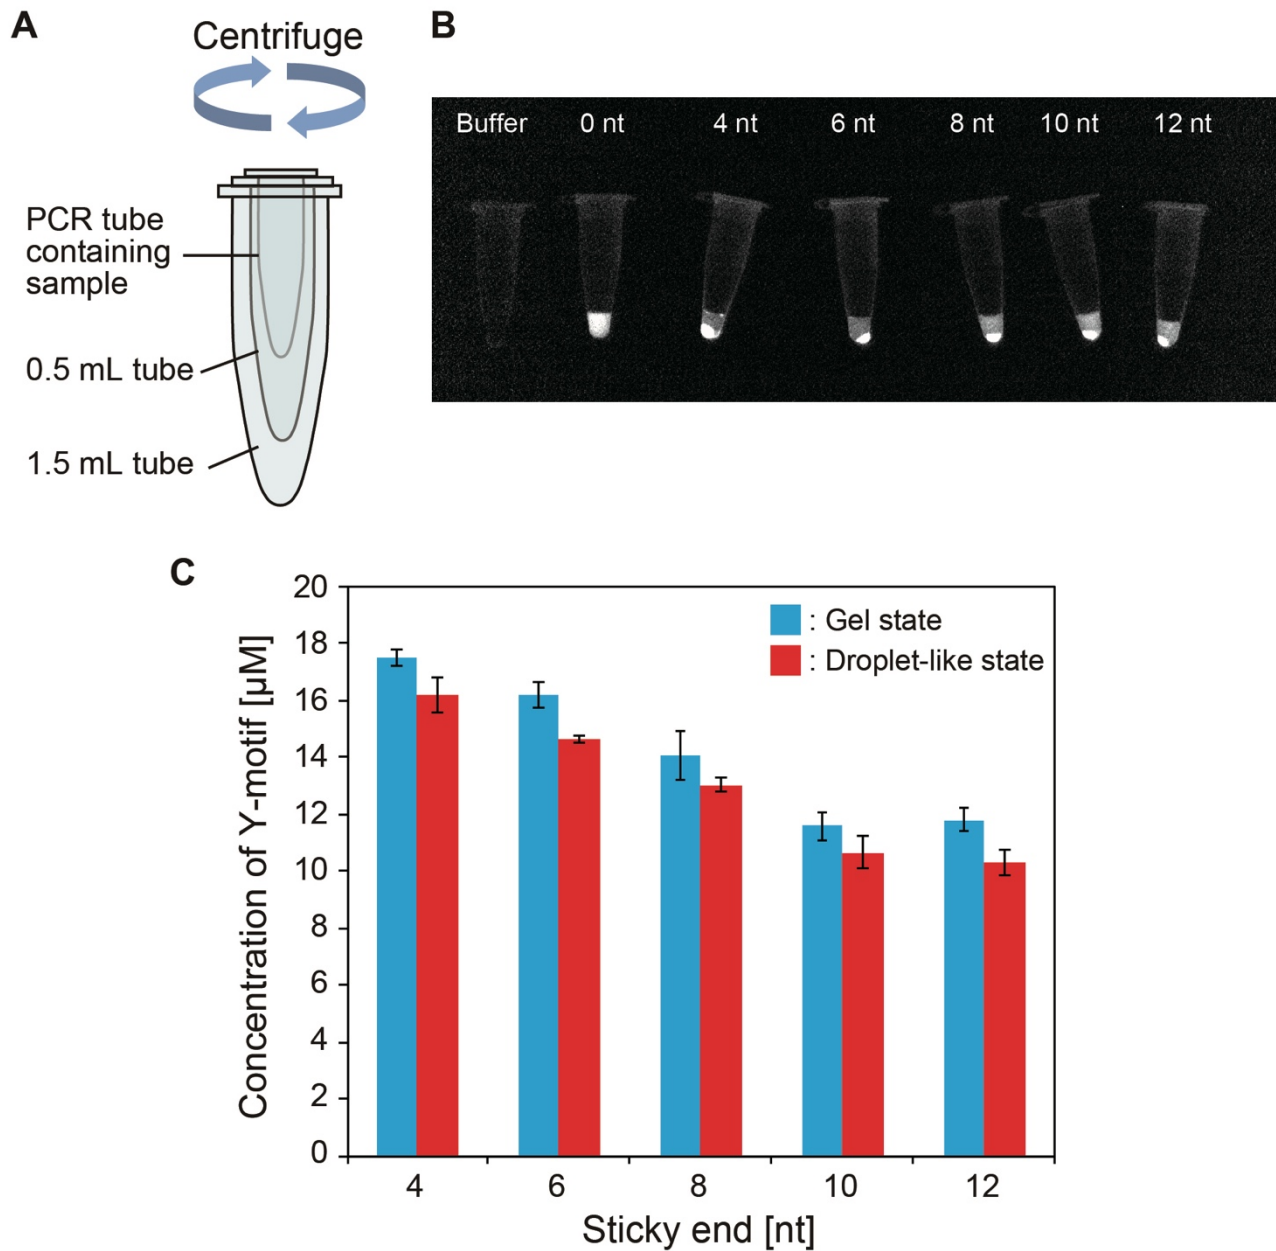

**Fig. S13. Estimation of Y-motif concentration for each of the different nucleotide lengths of sticky ends.** (A) Schematic illustration of the set-up. (B) Fluorescence photo images of the PCR tubes after centrifugation. (C) Estimates of the concentrations of Y-motifs with each length of sticky end in the droplet-like and gel states. Error bars indicate standard deviation (mean  $\pm$  S.D.,  $n = 3$ ).



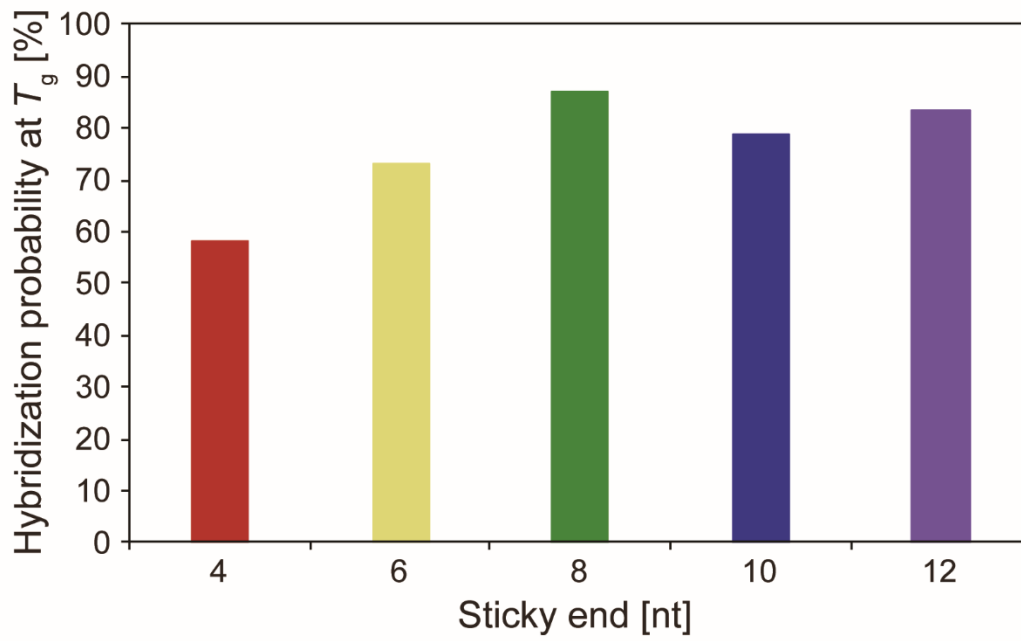

**Fig. S14. Hybridization probability at  $T_g$  (the state-change temperature between the droplet-like and gel states) under the experimentally estimated concentrations of sticky ends.** These values were obtained from numerical simulations using NUPACK software.

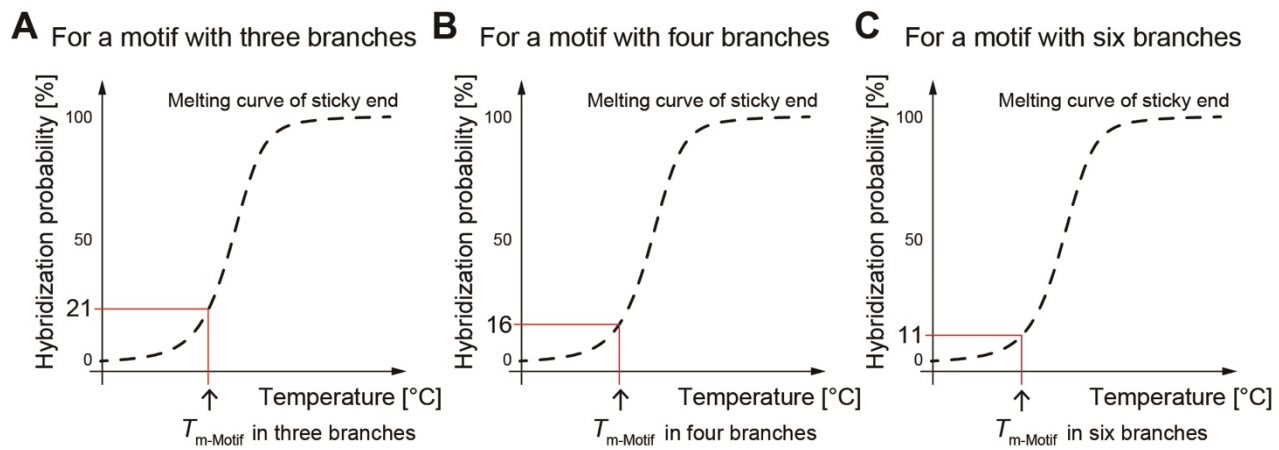

**Fig. S15. Definition of  $T_{m-Motif}$ , which represents the temperature at which at least one of the multiple sticky ends (SEs) can hybridize at a 50 % ratio.** To satisfy this, the hybridization probabilities of SEs in a motif with three, four, and six branches were 21, 16, 11 %, respectively.

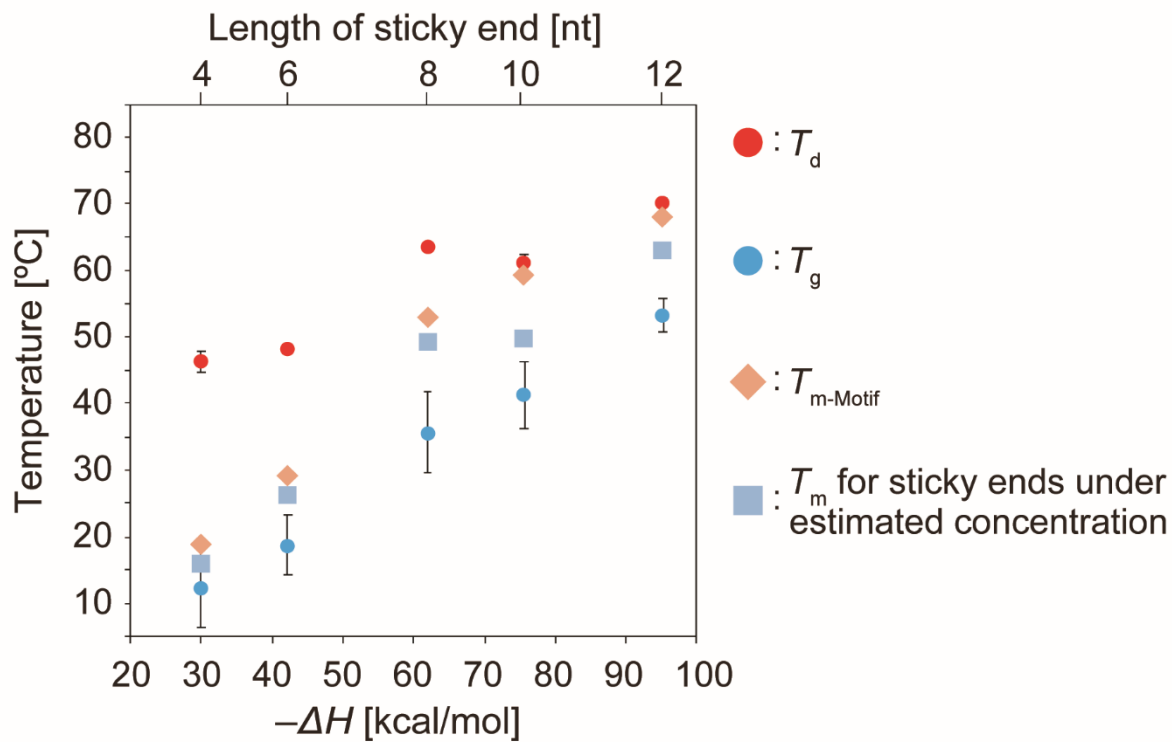

**Fig. S16.** Comparison of  $T_d$  (the state-change temperature between the dispersed and droplet-like states),  $T_g$  (the state-change temperature between the droplet-like and gel states),  $T_{m\text{-Motif}}$  (the  $T_m$  for the motifs at which half of the motifs in a solution are connected), and  $T_m$  for the sticky ends with the experimentally estimated concentrations in the Y-motif with each length of sticky end. Error bars indicate standard deviation (mean  $\pm$  S.D.,  $n = 3$ ).

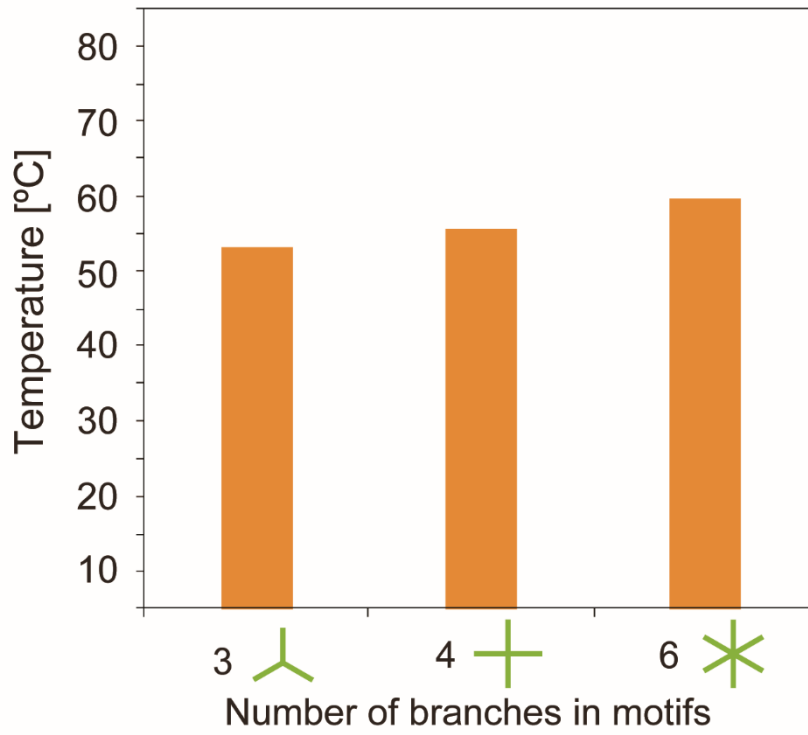

**Fig. S17.**  $T_{m\text{-Motif}}$  (the  $T_m$  for the motifs at which half of the motifs in a solution are connected) for DNA droplets with three, four, and six 8-nucleotide sticky ends.

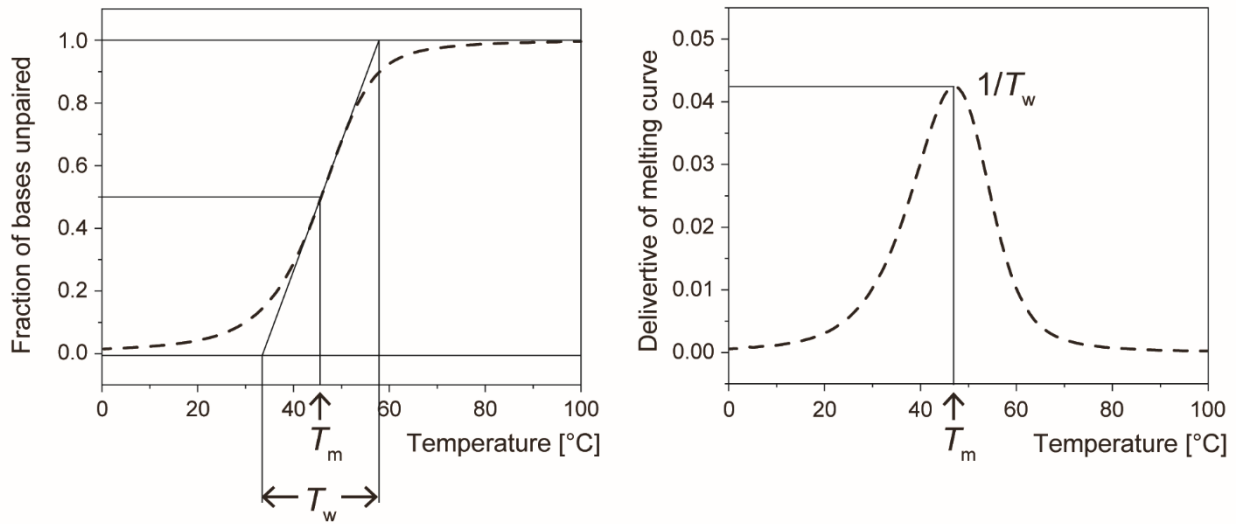

**Fig. S18. Definition of the width of the melting range ( $T_w$ ).**  $T_w$  was determined as the distance between intersections with horizontal lines 'Fraction of bases unpaired' = 0 and 1 of the tangent in a melting curve at the  $T_m$ .

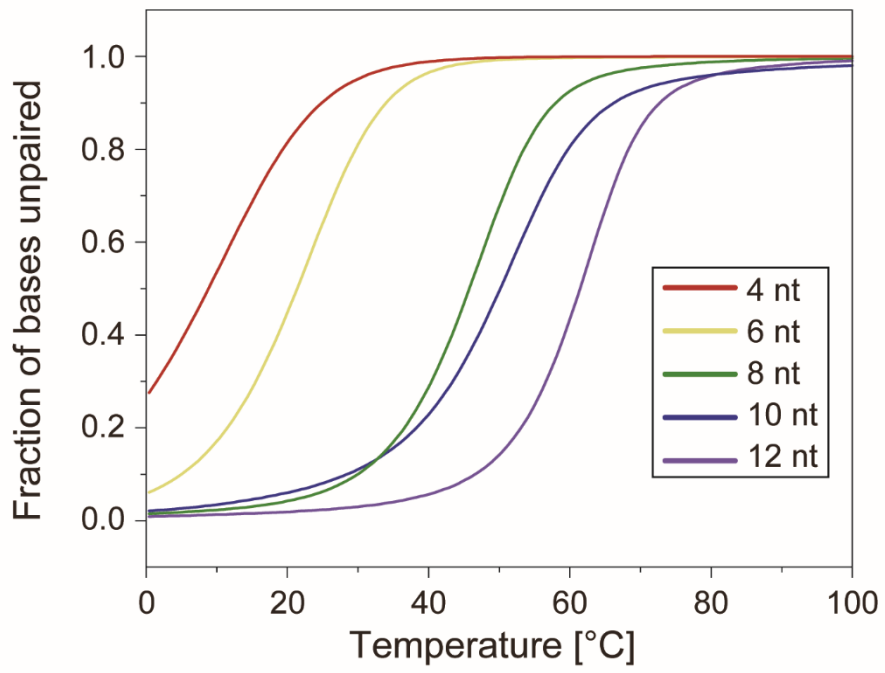

**Fig. S19. Melting curves for sticky ends that are 4, 6, 8, 10, and 12 nucleotides in length obtained through numerical simulation using NUPACK software.**

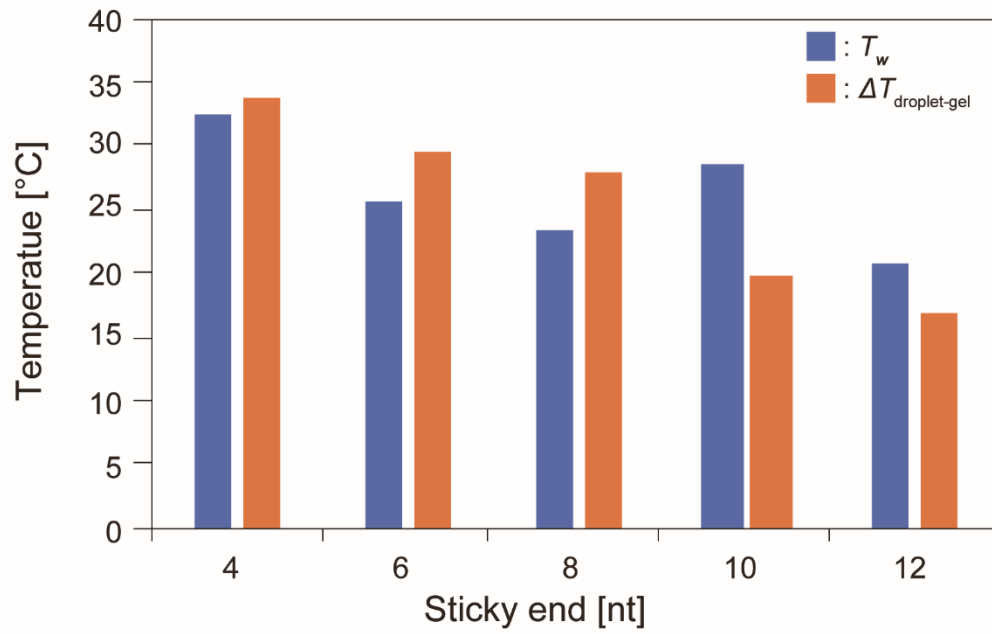

**Fig. S20.** Temperature differences between the  $T_d$  (the state-change temperature between the dispersed and droplet-like states),  $T_g$  (the state-change temperature between the droplet-like and gel states) ( $\Delta T_{\text{droplet-gel}}$ ), and  $T_w$  (the width of the melting range) for the different nucleotide lengths of the sticky ends examined.

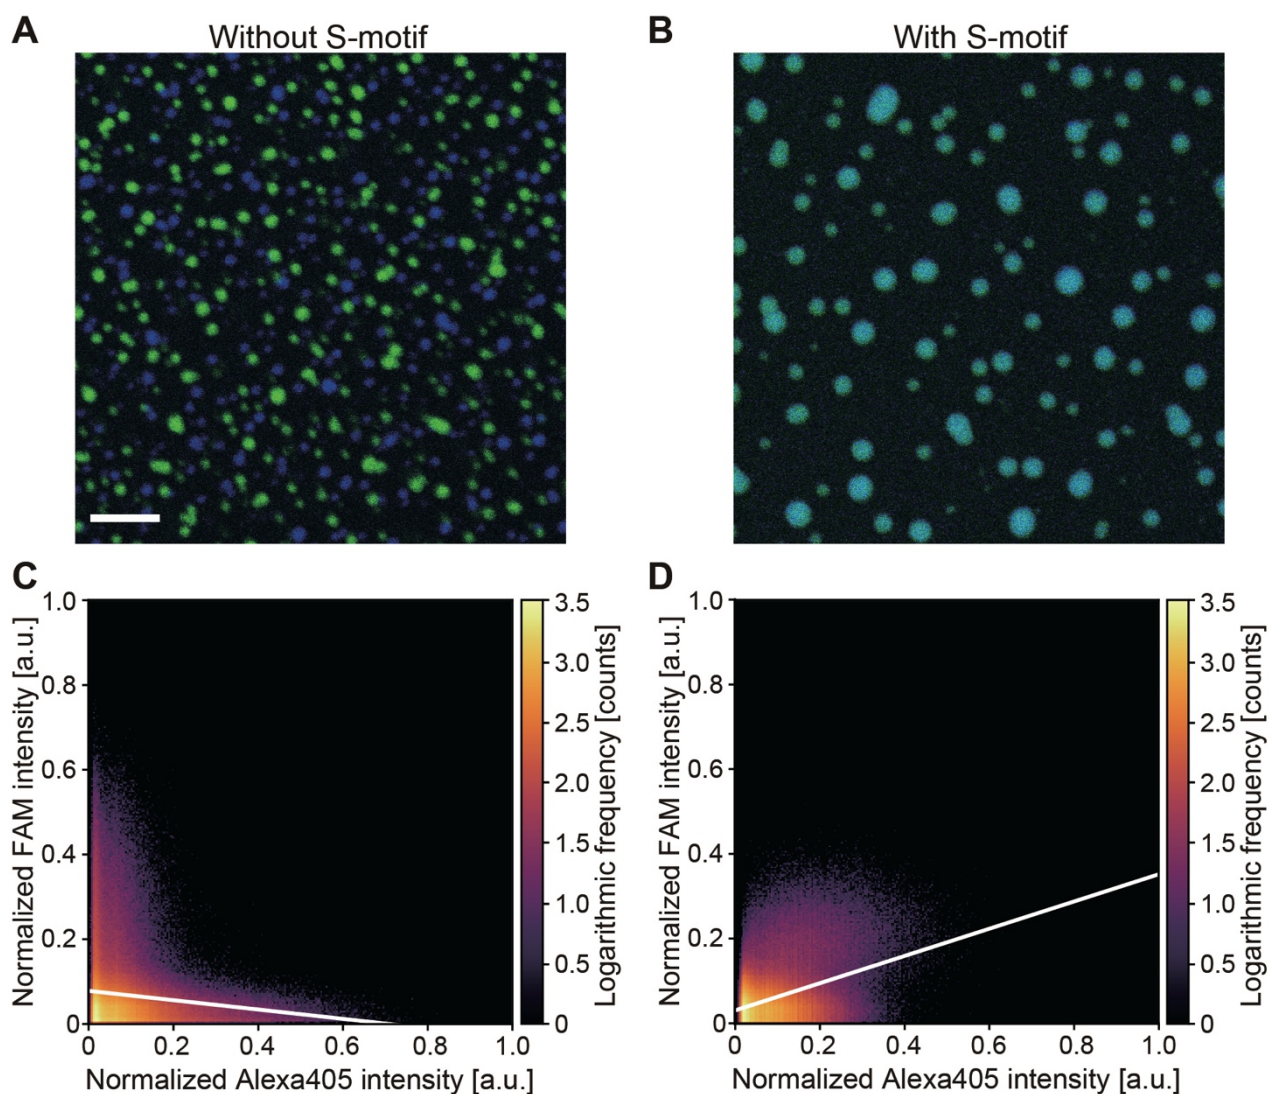

**Fig. S21. Colocalization analysis of FAM-labeled Y-motifs and Alexa405-labeled <sup>ortho</sup>Y-motifs.** (A) and (B), Microscopy images of Y- and <sup>ortho</sup>Y-motifs in droplet-like state without (A) and with S-motifs (B). Blue and green channels indicate <sup>ortho</sup>Y- (Alexa405) and Y-motifs (FAM), respectively. Scale bar: 30  $\mu\text{m}$ . (C) and (D), Two-dimensional histograms of the normalized intensity of FAM and Alexa405 without (C) and with S-motifs (D). White lines represent the linear regression line. In the graph without S-motifs, the slope of the line was negative, indicating a negative correlation between Y- and <sup>ortho</sup>Y-motifs (C). In the graph with S-motifs, the slope of the line was positive, indicating a positive correlation (D).



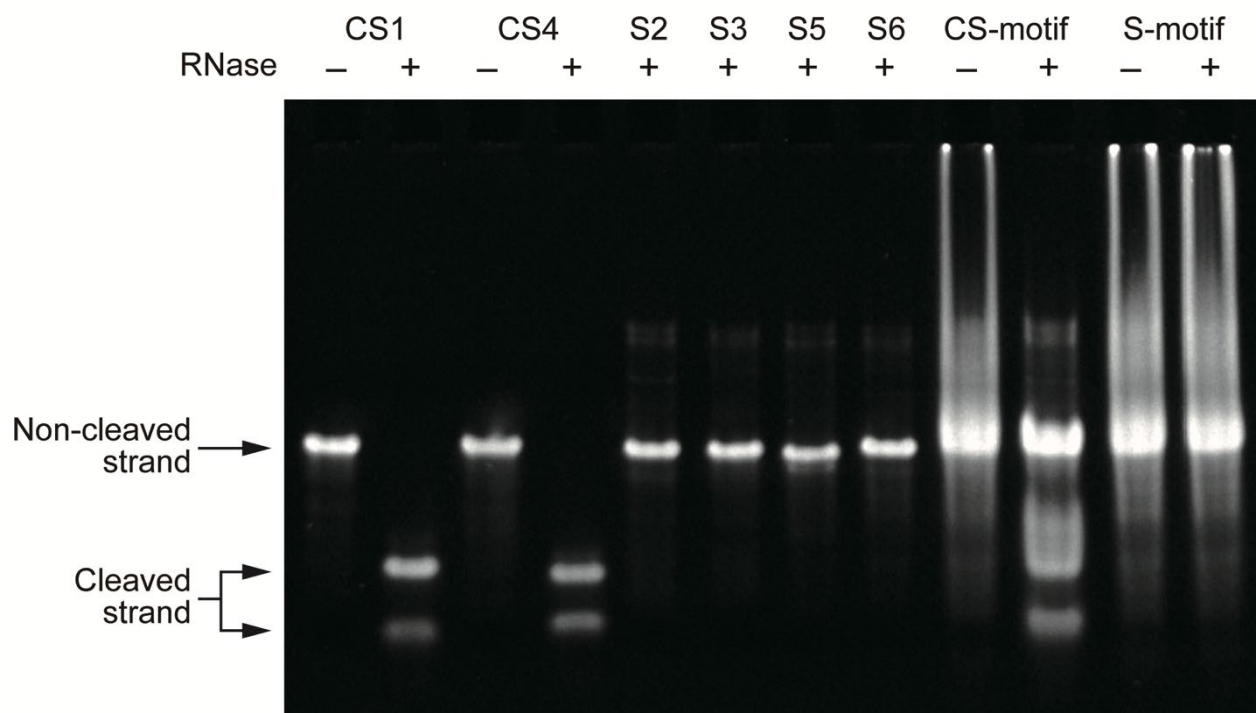

**Fig. S22. Denaturing gel electrophoresis of DNA–RNA chimera strands.** DNA–RNA chimera strands (CS1 and CS4) were successfully cleaved with RNase A, whereas the chimera strands without RNase A and the DNA strands (S2–S5) with and without RNase were not cleaved. Similarly, the chimera strands in the CS-motifs with RNase were cleaved, whereas the cleavage was not confirmed in the CS-motif without RNase A and in the S-motif with or without RNase.

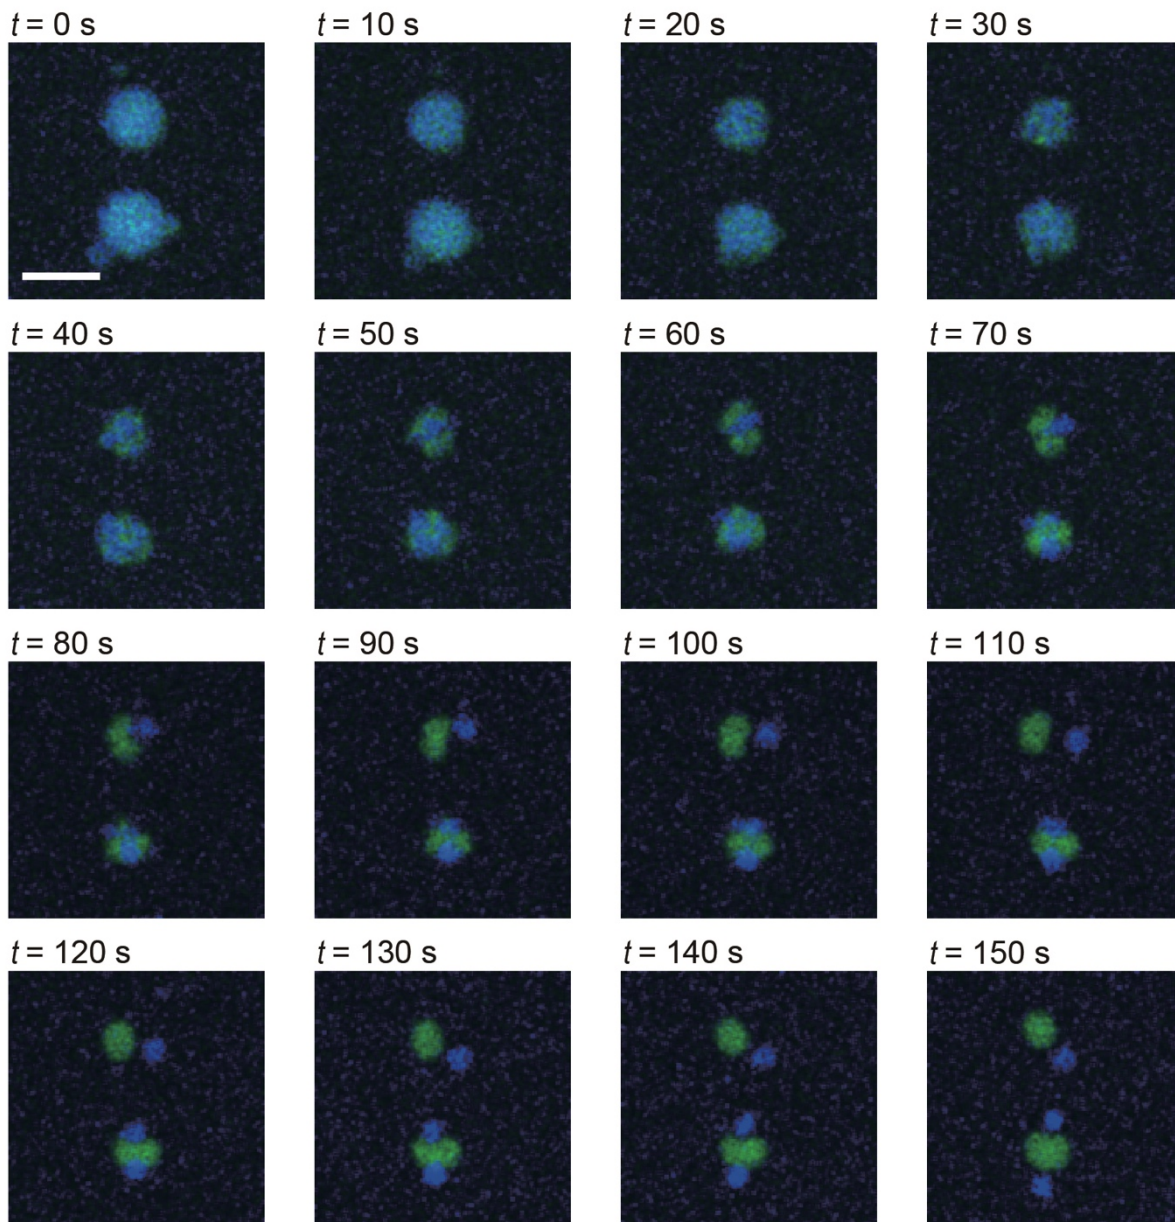

**Fig. S23. Detailed sequential microscopy images of the fission process of DNA droplets.** Blue and green channels indicate <sup>orth</sup>Y- and Y-motifs, respectively. Spinodal-like decomposition before the fission was observed during the fission process. We speculate that the driving force for the fission is electrical repulsion between <sup>orth</sup>Y- and Y-motifs.  $t = 0$  s indicates 10 s after the addition of RNase. Scale bar: 20  $\mu\text{m}$ .

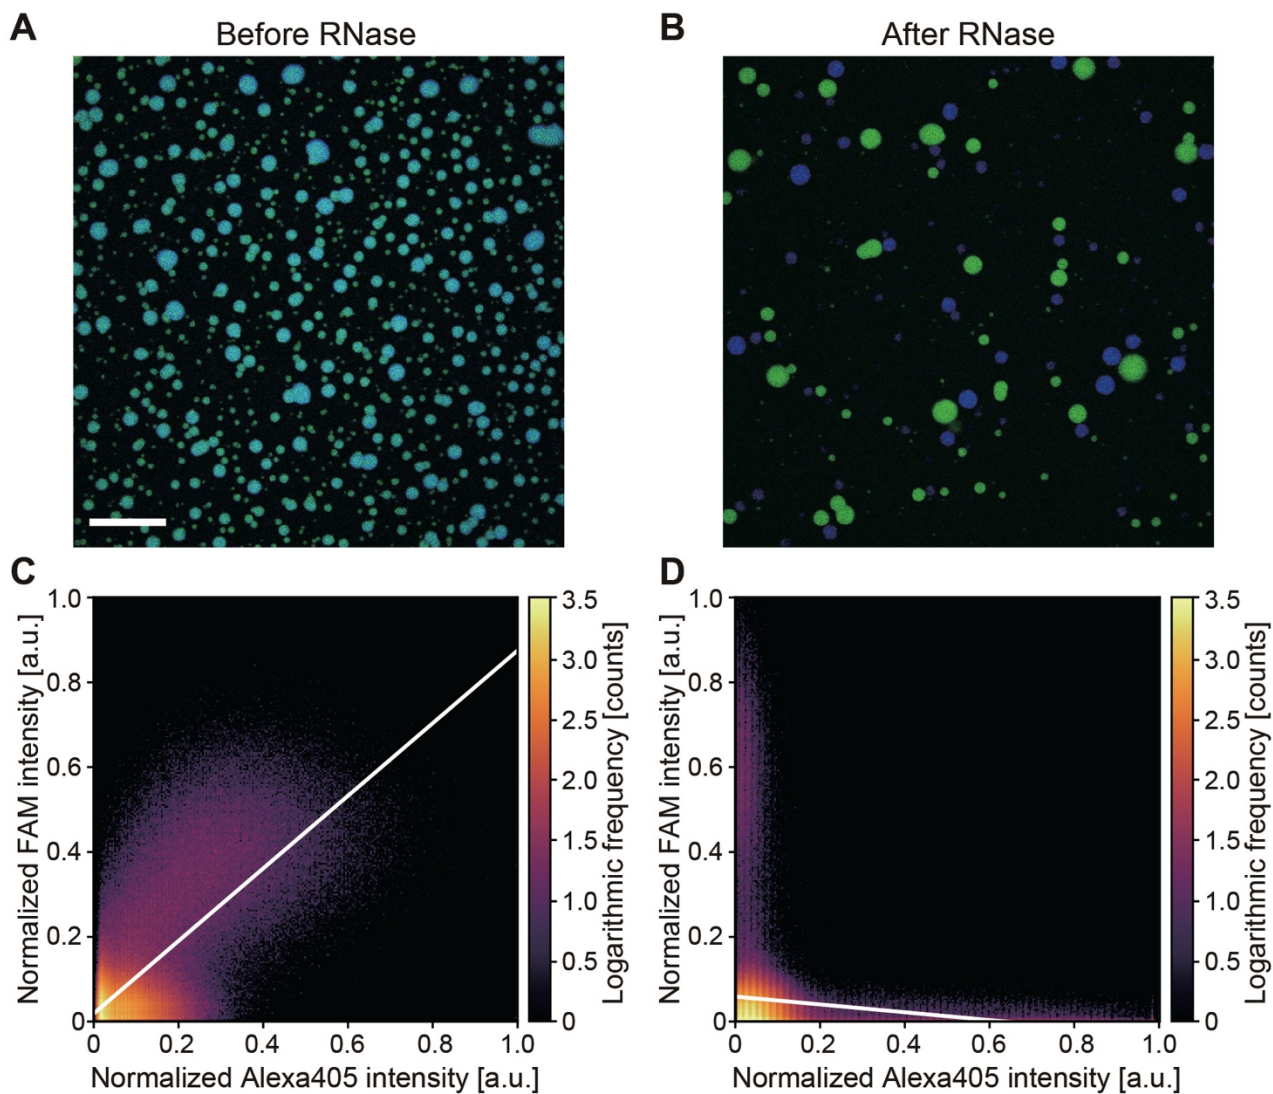

**Fig. S24. Colocalization analysis before and after addition of RNase A.** (A) and (B) Microscopic images of Y- and <sup>orth</sup>Y-motifs in the droplet-like state before (A) and after (B) addition of RNase A. Blue and green channels indicate <sup>orth</sup>Y- (Alexa405) and Y-motifs (FAM), respectively. Scale bar: 100  $\mu\text{m}$ . (C) and (D) Two-dimensional histograms of the intensity of FAM and Alexa405 before (C) and after (D) addition of RNase A. White lines represent the linear regression line. Before the addition of RNase A, the slope of the line was positive, indicating a positive correlation between Y- and <sup>orth</sup>Y-motifs (C). After the addition, the slope of the line was negative, indicating a negative correlation (D).

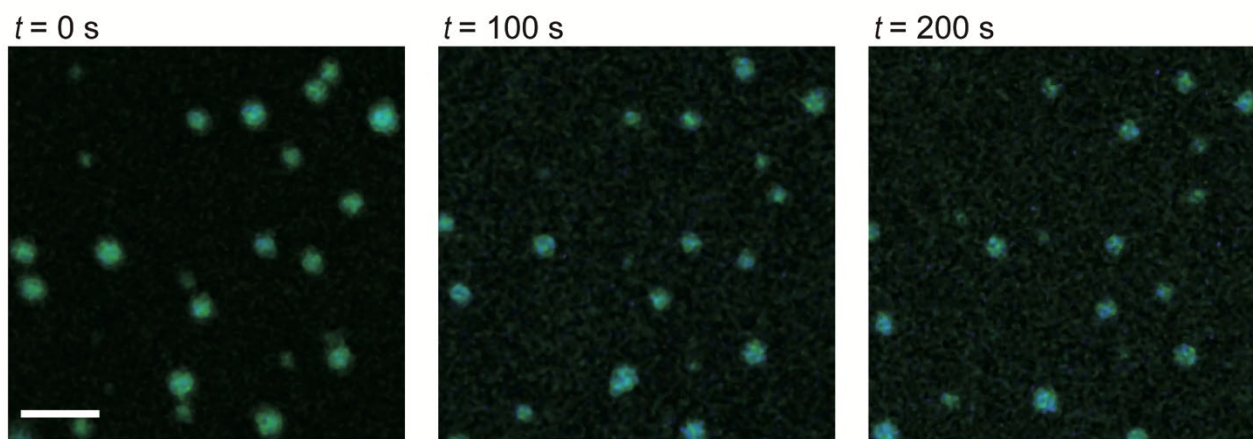

**Fig. S25. Droplet behavior after addition of buffer without RNase.** Blue and green channels indicate <sup>orth</sup>Y- (Alexa405) and Y-motifs (FAM), respectively.  $t = 0$  s indicates 10 s after the addition of RNase. Scale bar: 20  $\mu\text{m}$ .

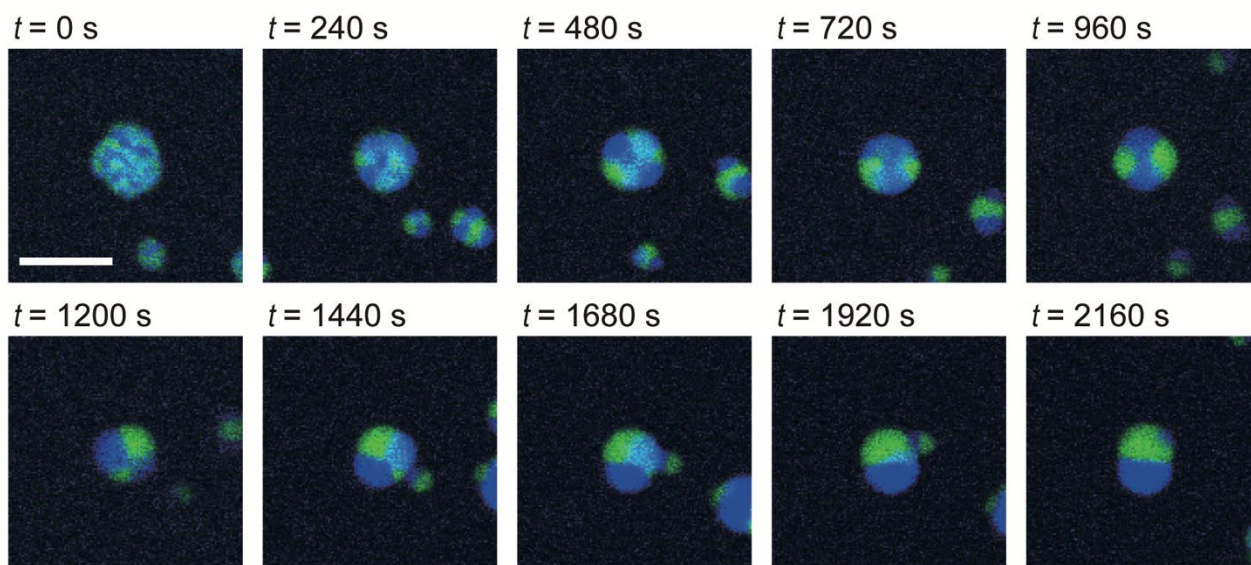

**Fig. S26. Sequential microscopy images of the formation process of the Janus shape.** Blue and green channels indicate <sup>orth</sup>Y- (Alexa405) and Y-motifs (FAM), respectively. Scale bar: 20  $\mu$ m.

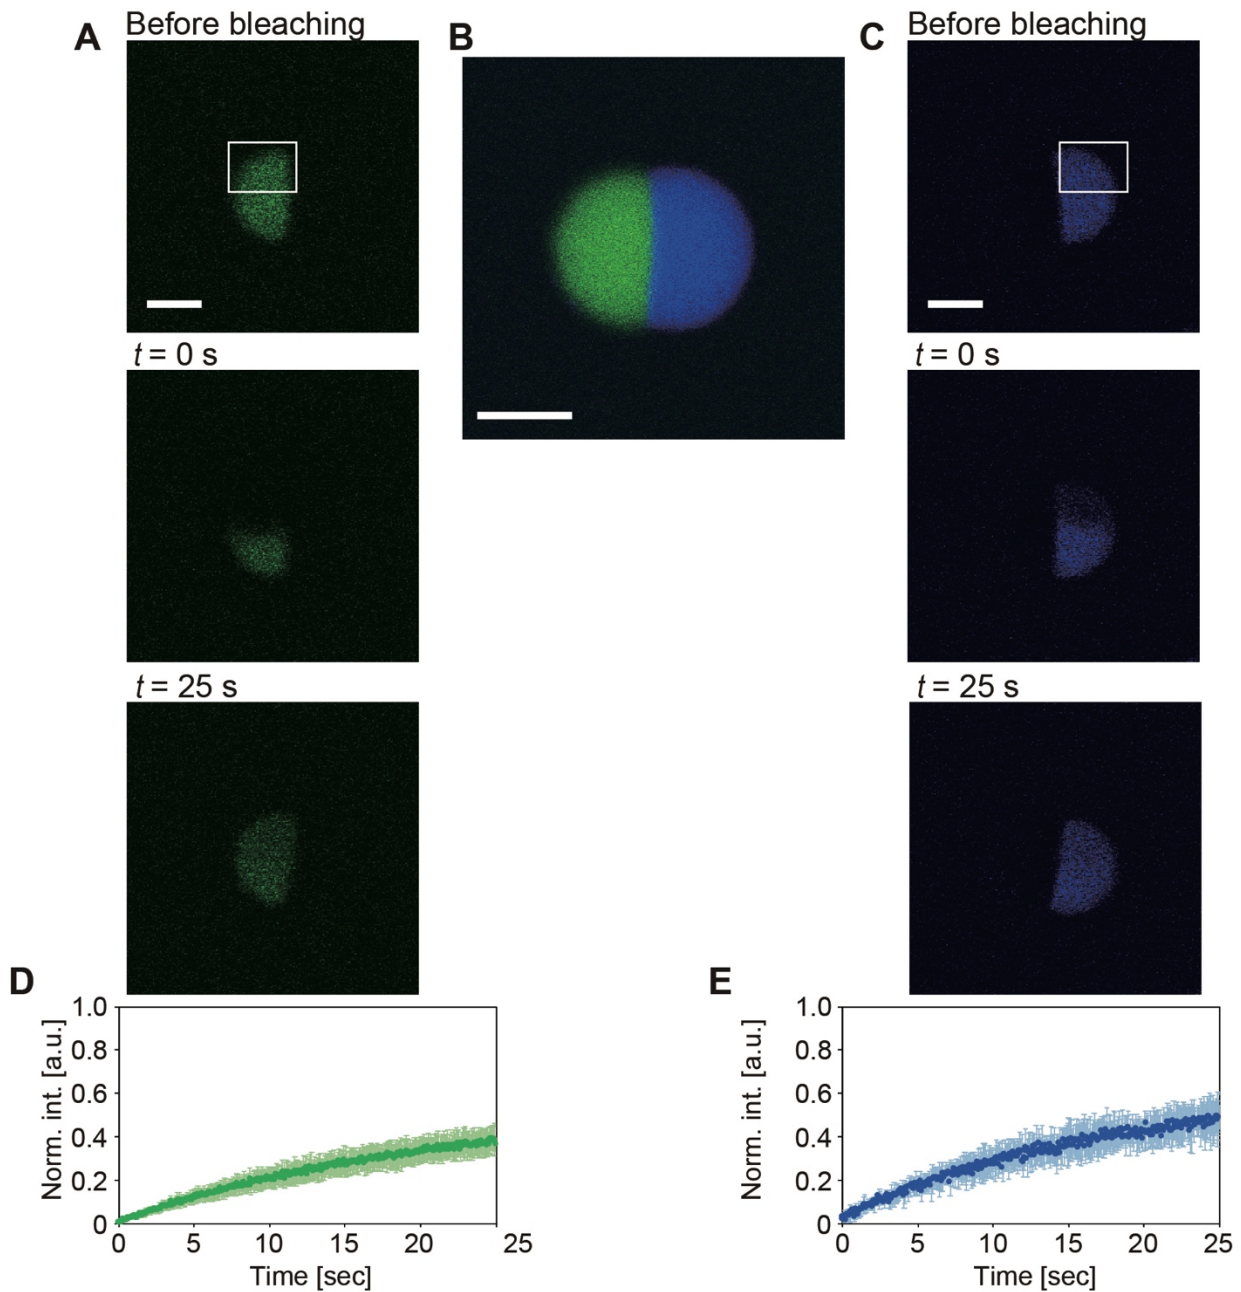

**Fig. S27. FRAP experiments to confirm the fluidity in both motifs in Janus droplets.** (A) and (C) Microscopy images from FRAP experiments for FAM-labeled Y-motifs (A) and Alexa405-labeled  $^{ortho}Y$ -motifs (C). The bleached region is indicated by a white box in each image. (B) Microscopy images of Janus droplets before photo-bleaching. Scale bars: 10  $\mu\text{m}$ . (D) and (E) Time series of fluorescence intensity of FAM-labeled Y-motifs (D) and Alexa405-labeled  $^{ortho}Y$ -motifs (E). Error bars show standard deviation ( $n = 3$ ).

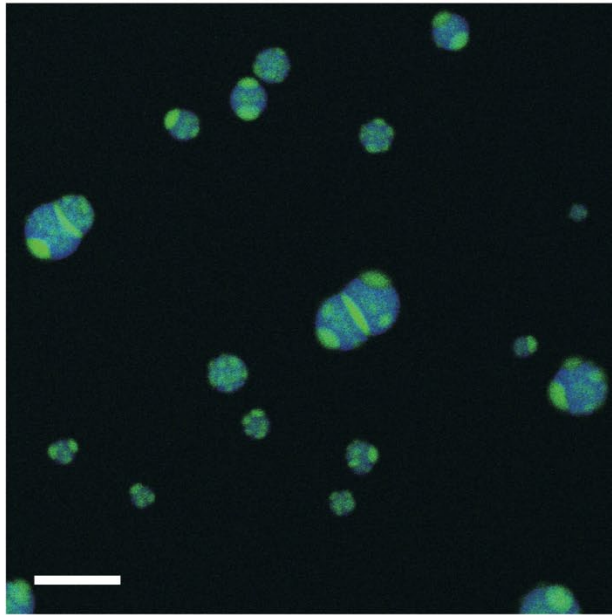

**Fig. S28. Patchy-like patterns in DNA droplets.** These were formed with 50 % DNA–RNA chimera strands in the CS-motifs after enzymatic reaction. Blue and green channels indicate <sup>ortho</sup>Y- (Alexa405) and Y-motifs (FAM), respectively. The image was obtained 2 h after addition of RNase A. Scale bar: 30  $\mu\text{m}$ .

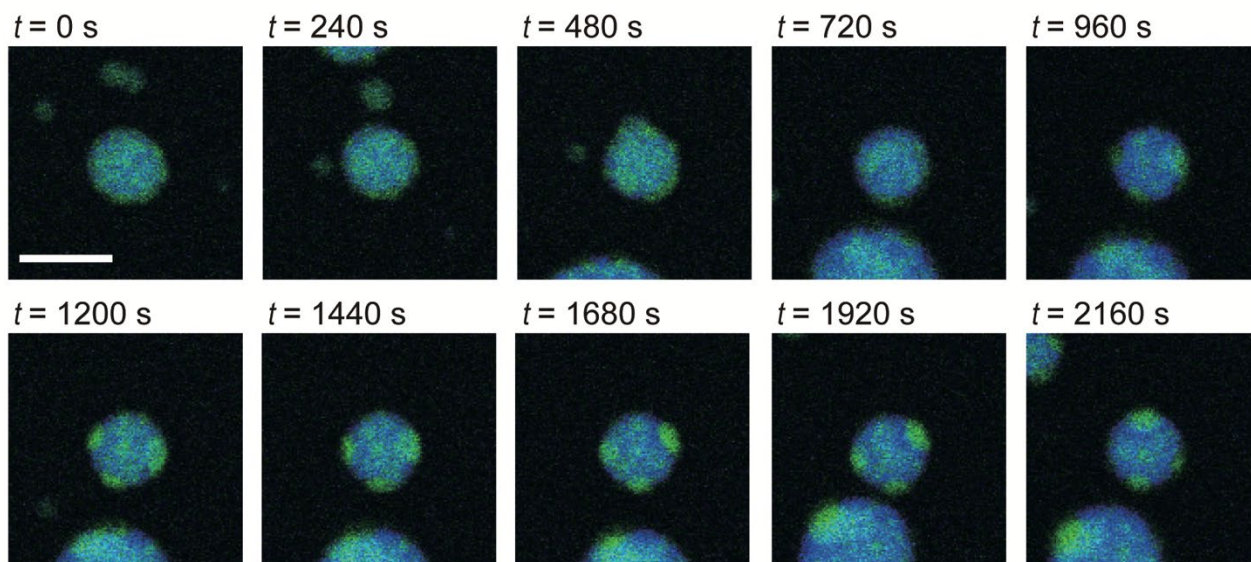

**Fig. S29. Sequential microscopy images of the formation process of patchy-like patterns.** Blue and green channels indicate  $^{\text{orth}}$ Y- (Alexa405) and Y-motifs (FAM), respectively. Scale bar: 20  $\mu\text{m}$ .



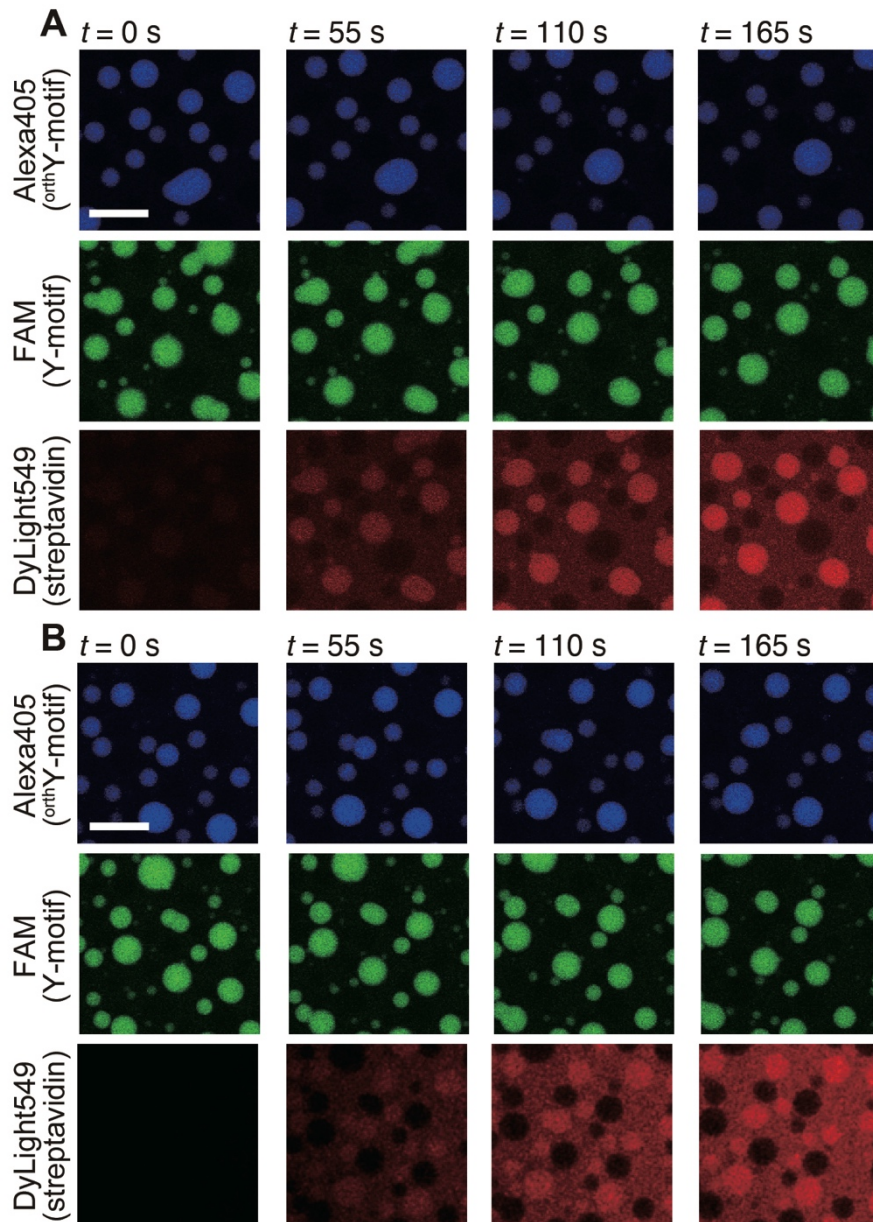

**Fig. S30. Sequential microscopy images of the accumulation process of DNA-modified streptavidin in DNA droplets composed of Y- (A) and <sup>ortho</sup>Y-motifs (B). Scale bars: 50  $\mu\text{m}$ .**

### **Captions for Supplementary Movies**

**Movie S1.** Fusion of DNA droplets composed of Y-motifs with 8-nucleotide sticky ends. This movie was obtained at 63 °C. Scale bar: 30 μm.

**Movie S2.** Selective and exclusive fusion of DNA droplets composed of Y- or <sup>orth</sup>Y-motifs with 8-nucleotide sticky ends. Sequences of DNAs for the two motifs were not complementary. Blue and green channels indicate <sup>orth</sup>Y-(Alexa405) and Y-motifs (FAM), respectively. This movie was obtained at 64 °C. Scale bar: 30 μm.

**Movie S3.** Fission of DNA droplets composed of Y-, <sup>orth</sup>Y-, and chimerized-six-junction motifs with 8-nucleotide sticky ends. Blue and green channels indicate <sup>orth</sup>Y-(Alexa405) and Y-motifs (FAM), respectively. This movie was obtained at 65 °C. Filming began 10 s after addition of RNase A. Scale bar: 20 μm.
